# Supplementary material for: New Approaches for Calculating Moran’s Index of Spatial Autocorrelation
Source: PLoS One. 2013 Jul 12;8(7):e68336. doi: 10.1371/journal.pone.0068336 (PMC3709922; doi:10.1371/journal.pone.0068336)
Supplement: File S2 — Data sets and partial processes of computing Moran’s index and Geary’s coefficient. (XLSX) [file pone.0068336.s002.xlsx]

## Sheet: Data
City	Population size in 2000	Distance Matrix		Beijing	Tianjin	Shijiazhuang	Taiyuan	Hohehot	Shenyang	Changchun	Harbin	Shanghai	Nanjing	Hangzhou	Hefei	Fuzhou	Nanchang	Jinan	Zhengzhou	Wuchang	Changsha	Guangzhou	Nanning	Chongqing	Chengdu	Guiyang	Kunming	Xi'an	Lanzhou	Xining	Yinchuan	Urumchi
Beijing	9496688		Beijing	0	137	277	508	667	741	1046	1288	1463	1160	1589	1074	2334	1449	497	689	1225	1587	2294	2566	2087	2042	2539	3178	1159	1811	2092	1343	3768
Tianjin	5313702		Tianjin	137	0	419	650	804	728	1033	1275	1326	1023	1452	973	2197	1444	360	831	1367	1729	2436	2708	2230	2185	2681	3320	1301	1948	2235	1480	3911
Shijiazhuang	1930579		Shijiazhuang	277	419	0	231	871	1126	1431	1673	1267	964	1393	914	1915	1293	301	412	948	1310	2017	2289	1810	1765	2262	2901	923	1599	1815	1547	3491
Taiyuan	2538336		Taiyuan	508	650	231	0	640	1255	1560	1802	1498	1195	1624	1145	2521	1544	532	577	1179	1537	2243	2515	1997	1493	2460	2593	651	1327	1543	1316	3219
Hohehot	990954		Hohehot	667	804	871	640	0	1408	1713	1955	2130	1827	2256	1777	3303	2674	1164	1362	1898	2256	2962	3234	2637	2133	3100	3233	1291	1144	1360	676	3036
Shenyang	4344933		Shenyang	741	728	1126	1255	1408	0	305	547	2054	1751	2180	1701	2925	2151	1088	1538	1972	2334	3041	3313	2834	2789	3286	3925	1906	2552	2839	2084	4515
Changchun	2696430		Changchun	1046	1033	1431	1560	1713	305	0	242	2359	2056	2485	2006	3230	2456	1393	1843	2277	2639	3346	3618	3139	3094	3591	4230	2211	2857	3144	2389	4820
Harbin	3455065		Harbin	1288	1275	1673	1802	1955	547	242	0	2601	2298	2727	2248	3472	2698	1635	2085	2519	2881	3588	3860	3381	3336	3833	4472	2453	3099	3386	2631	5062
Shanghai	12720701		Shanghai	1463	1326	1267	1498	2130	2054	2359	2601	0	303	201	615	1180	844	966	998	1235	1207	1810	2082	2516	2351	2053	2699	1509	2185	2401	2355	4077
Nanjing	3447184		Nanjing	1160	1023	964	1195	1827	1751	2056	2298	303	0	429	312	1174	838	663	695	1231	1201	1804	2076	2093	2048	2054	2693	1206	1882	2098	2052	3774
Hangzhou	2451319		Hangzhou	1589	1452	1393	1624	2256	2180	2485	2727	201	429	0	451	979	643	1092	1124	1202	1006	1609	1881	2315	2552	1852	2498	1635	2311	2527	2481	4065
Hefei	1462828		Hefei	1074	973	914	1145	1777	1701	2006	2248	615	312	451	0	1196	478	613	645	1181	1226	1829	2210	2043	1998	2076	3098	1156	1832	2048	2002	3724
Fuzhou	1981083		Fuzhou	2334	2197	1915	2521	3303	2925	3230	3472	1180	1174	979	1196	0	622	1837	1649	1013	985	1588	1860	2301	2805	1838	2477	2389	3065	3281	3235	4957
Nanchang	1669679		Nanchang	1449	1444	1293	1544	2674	2151	2456	2698	844	838	643	478	622	0	1137	927	391	419	1022	1294	1735	2239	1272	1911	1412	2088	2304	2258	4391
Jinan	2585986		Jinan	497	360	301	532	1164	1088	1393	1635	966	663	1092	613	1837	1137	0	666	1202	1564	2156	2428	2064	2019	2516	3119	1177	1853	2069	1840	3745
Zhengzhou	2490838		Zhengzhou	689	831	412	577	1362	1538	1843	2085	998	695	1124	645	1649	927	666	0	536	898	1605	1877	1398	1353	1850	2489	511	1187	1403	1357	3079
Wuchang	6559426		Wuchang	1225	1367	948	1179	1898	1972	2277	2519	1235	1231	1202	1181	1013	391	1202	536	0	362	1069	1341	1233	1737	1314	1953	1047	1723	1939	1893	3615
Changsha	2122873		Changsha	1587	1729	1310	1537	2256	2334	2639	2881	1207	1201	1006	1226	985	419	1564	898	362	0	707	979	1419	1923	956	1595	1405	2081	2297	2251	3973
Guangzhou	6868736		Guangzhou	2294	2436	2017	2243	2962	3041	3346	3588	1810	1804	1609	1829	1588	1022	2156	1605	1069	707	0	1314	2023	2527	1560	2199	2111	2787	3003	2957	4679
Nanning	1354576		Nanning	2566	2708	2289	2515	3234	3313	3618	3860	2082	2076	1881	2210	1860	1294	2428	1877	1341	979	1314	0	1328	1832	865	1504	2383	3059	3275	3229	4951
Chongqing	5676406		Chongqing	2087	2230	1810	1997	2637	2834	3139	3381	2516	2093	2315	2043	2301	1735	2064	1398	1233	1419	2023	1328	0	504	463	1102	1346	1676	1892	1846	3530
Chengdu	3821511		Chengdu	2042	2185	1765	1493	2133	2789	3094	3336	2351	2048	2552	1998	2805	2239	2019	1353	1737	1923	2527	1832	504	0	967	1100	842	1172	1388	1342	3026
Guiyang	1829565		Guiyang	2539	2681	2262	2460	3100	3286	3591	3833	2053	2054	1852	2076	1838	1272	2516	1850	1314	956	1560	865	463	967	0	639	1809	2139	2355	2309	3993
Kunming	2478580		Kunming	3178	3320	2901	2593	3233	3925	4230	4472	2699	2693	2498	3098	2477	1911	3119	2489	1953	1595	2199	1504	1102	1100	639	0	1942	2272	2488	2442	4126
Xi'an	3645322		Xi'an	1159	1301	923	651	1291	1906	2211	2453	1509	1206	1635	1156	2389	1412	1177	511	1047	1405	2111	2383	1346	842	1809	1942	0	676	892	846	2568
Lanzhou	1815338		Lanzhou	1811	1948	1599	1327	1144	2552	2857	3099	2185	1882	2311	1832	3065	2088	1853	1187	1723	2081	2787	3059	1676	1172	2139	2272	676	0	216	468	1892
Xining	854466		Xining	2092	2235	1815	1543	1360	2839	3144	3386	2401	2098	2527	2048	3281	2304	2069	1403	1939	2297	3003	3275	1892	1388	2355	2488	892	216	0	684	2108
Yinchuan	578362		Yinchuan	1343	1480	1547	1316	676	2084	2389	2631	2355	2052	2481	2002	3235	2258	1840	1357	1893	2251	2957	3229	1846	1342	2309	2442	846	468	684	0	2008
Urumchi	1727712		Urumchi	3768	3911	3491	3219	3036	4515	4820	5062	4077	3774	4065	3724	4957	4391	3745	3079	3615	3973	4679	4951	3530	3026	3993	4126	2568	1892	2108	2008	0

## Sheet: Three-step method
City	Population size in 2000 (x)	Standardized data (z)	Distance Matrix		Beijing	Tianjin	Shijiazhuang	Taiyuan	Hohehot	Shenyang	Changchun	Harbin	Shanghai	Nanjing	Hangzhou	Hefei	Fuzhou	Nanchang	Jinan	Zhengzhou	Wuchang	Changsha	Guangzhou	Nanning	Chongqing	Chengdu	Guiyang	Kunming	Xi'an	Lanzhou	Xining	Yinchuan	Urumchi
Beijing	9496688	2.28758		Beijing	0	137	277	508	667	741	1046	1288	1463	1160	1589	1074	2334	1449	497	689	1225	1587	2294	2566	2087	2042	2539	3178	1159	1811	2092	1343	3768
Tianjin	5313702	0.715303		Tianjin	137	0	419	650	804	728	1033	1275	1326	1023	1452	973	2197	1444	360	831	1367	1729	2436	2708	2230	2185	2681	3320	1301	1948	2235	1480	3911
Shijiazhuang	1930579	-0.556324		Shijiazhuang	277	419	0	231	871	1126	1431	1673	1267	964	1393	914	1915	1293	301	412	948	1310	2017	2289	1810	1765	2262	2901	923	1599	1815	1547	3491
Taiyuan	2538336	-0.327884		Taiyuan	508	650	231	0	640	1255	1560	1802	1498	1195	1624	1145	2521	1544	532	577	1179	1537	2243	2515	1997	1493	2460	2593	651	1327	1543	1316	3219
Hohehot	990954	-0.909504		Hohehot	667	804	871	640	0	1408	1713	1955	2130	1827	2256	1777	3303	2674	1164	1362	1898	2256	2962	3234	2637	2133	3100	3233	1291	1144	1360	676	3036
Shenyang	4344933	0.351168		Shenyang	741	728	1126	1255	1408	0	305	547	2054	1751	2180	1701	2925	2151	1088	1538	1972	2334	3041	3313	2834	2789	3286	3925	1906	2552	2839	2084	4515
Changchun	2696430	-0.268461		Changchun	1046	1033	1431	1560	1713	305	0	242	2359	2056	2485	2006	3230	2456	1393	1843	2277	2639	3346	3618	3139	3094	3591	4230	2211	2857	3144	2389	4820
Harbin	3455065	0.0166902		Harbin	1288	1275	1673	1802	1955	547	242	0	2601	2298	2727	2248	3472	2698	1635	2085	2519	2881	3588	3860	3381	3336	3833	4472	2453	3099	3386	2631	5062
Shanghai	12720701	3.4994		Shanghai	1463	1326	1267	1498	2130	2054	2359	2601	0	303	201	615	1180	844	966	998	1235	1207	1810	2082	2516	2351	2053	2699	1509	2185	2401	2355	4077
Nanjing	3447184	0.0137279		Nanjing	1160	1023	964	1195	1827	1751	2056	2298	303	0	429	312	1174	838	663	695	1231	1201	1804	2076	2093	2048	2054	2693	1206	1882	2098	2052	3774
Hangzhou	2451319	-0.360591		Hangzhou	1589	1452	1393	1624	2256	2180	2485	2727	201	429	0	451	979	643	1092	1124	1202	1006	1609	1881	2315	2552	1852	2498	1635	2311	2527	2481	4065
Hefei	1462828	-0.732139		Hefei	1074	973	914	1145	1777	1701	2006	2248	615	312	451	0	1196	478	613	645	1181	1226	1829	2210	2043	1998	2076	3098	1156	1832	2048	2002	3724
Fuzhou	1981083	-0.537341		Fuzhou	2334	2197	1915	2521	3303	2925	3230	3472	1180	1174	979	1196	0	622	1837	1649	1013	985	1588	1860	2301	2805	1838	2477	2389	3065	3281	3235	4957
Nanchang	1669679	-0.654389		Nanchang	1449	1444	1293	1544	2674	2151	2456	2698	844	838	643	478	622	0	1137	927	391	419	1022	1294	1735	2239	1272	1911	1412	2088	2304	2258	4391
Jinan	2585986	-0.309974		Jinan	497	360	301	532	1164	1088	1393	1635	966	663	1092	613	1837	1137	0	666	1202	1564	2156	2428	2064	2019	2516	3119	1177	1853	2069	1840	3745
Zhengzhou	2490838	-0.345737		Zhengzhou	689	831	412	577	1362	1538	1843	2085	998	695	1124	645	1649	927	666	0	536	898	1605	1877	1398	1353	1850	2489	511	1187	1403	1357	3079
Wuchang	6559426	1.18354		Wuchang	1225	1367	948	1179	1898	1972	2277	2519	1235	1231	1202	1181	1013	391	1202	536	0	362	1069	1341	1233	1737	1314	1953	1047	1723	1939	1893	3615
Changsha	2122873	-0.484046		Changsha	1587	1729	1310	1537	2256	2334	2639	2881	1207	1201	1006	1226	985	419	1564	898	362	0	707	979	1419	1923	956	1595	1405	2081	2297	2251	3973
Guangzhou	6868736	1.2998		Guangzhou	2294	2436	2017	2243	2962	3041	3346	3588	1810	1804	1609	1829	1588	1022	2156	1605	1069	707	0	1314	2023	2527	1560	2199	2111	2787	3003	2957	4679
Nanning	1354576	-0.772828		Nanning	2566	2708	2289	2515	3234	3313	3618	3860	2082	2076	1881	2210	1860	1294	2428	1877	1341	979	1314	0	1328	1832	865	1504	2383	3059	3275	3229	4951
Chongqing	5676406	0.851634		Chongqing	2087	2230	1810	1997	2637	2834	3139	3381	2516	2093	2315	2043	2301	1735	2064	1398	1233	1419	2023	1328	0	504	463	1102	1346	1676	1892	1846	3530
Chengdu	3821511	0.154428		Chengdu	2042	2185	1765	1493	2133	2789	3094	3336	2351	2048	2552	1998	2805	2239	2019	1353	1737	1923	2527	1832	504	0	967	1100	842	1172	1388	1342	3026
Guiyang	1829565	-0.594292		Guiyang	2539	2681	2262	2460	3100	3286	3591	3833	2053	2054	1852	2076	1838	1272	2516	1850	1314	956	1560	865	463	967	0	639	1809	2139	2355	2309	3993
Kunming	2478580	-0.350345		Kunming	3178	3320	2901	2593	3233	3925	4230	4472	2699	2693	2498	3098	2477	1911	3119	2489	1953	1595	2199	1504	1102	1100	639	0	1942	2272	2488	2442	4126
Xi'an	3645322	0.0882028		Xi'an	1159	1301	923	651	1291	1906	2211	2453	1509	1206	1635	1156	2389	1412	1177	511	1047	1405	2111	2383	1346	842	1809	1942	0	676	892	846	2568
Lanzhou	1815338	-0.59964		Lanzhou	1811	1948	1599	1327	1144	2552	2857	3099	2185	1882	2311	1832	3065	2088	1853	1187	1723	2081	2787	3059	1676	1172	2139	2272	676	0	216	468	1892
Xining	854466	-0.960806		Xining	2092	2235	1815	1543	1360	2839	3144	3386	2401	2098	2527	2048	3281	2304	2069	1403	1939	2297	3003	3275	1892	1388	2355	2488	892	216	0	684	2108
Yinchuan	578362	-1.06459		Yinchuan	1343	1480	1547	1316	676	2084	2389	2631	2355	2052	2481	2002	3235	2258	1840	1357	1893	2251	2957	3229	1846	1342	2309	2442	846	468	684	0	2008
Urumchi	1727712	-0.632576		Urumchi	3768	3911	3491	3219	3036	4515	4820	5062	4077	3774	4065	3724	4957	4391	3745	3079	3615	3973	4679	4951	3530	3026	3993	4126	2568	1892	2108	2008	0
Average	3.41066e+06	1.18679e-16
Stdevp	2.66047e+06	1	V		Beijing	Tianjin	Shijiazhuang	Taiyuan	Hohehot	Shenyang	Changchun	Harbin	Shanghai	Nanjing	Hangzhou	Hefei	Fuzhou	Nanchang	Jinan	Zhengzhou	Wuchang	Changsha	Guangzhou	Nanning	Chongqing	Chengdu	Guiyang	Kunming	Xi'an	Lanzhou	Xining	Yinchuan	Urumchi
				Beijing	0	0.00729927	0.00361011	0.0019685	0.00149925	0.00134953	0.000956023	0.000776398	0.000683527	0.000862069	0.000629327	0.000931099	0.000428449	0.000690131	0.00201207	0.00145138	0.000816327	0.00063012	0.00043592	0.000389712	0.000479157	0.000489716	0.000393856	0.000314663	0.000862813	0.000552181	0.000478011	0.000744602	0.000265393
Moran's I	-0.0314565			Tianjin	0.00729927	0	0.00238663	0.00153846	0.00124378	0.00137363	0.000968054	0.000784314	0.000754148	0.000977517	0.000688705	0.00102775	0.000455166	0.000692521	0.00277778	0.00120337	0.000731529	0.000578369	0.000410509	0.000369276	0.00044843	0.000457666	0.000372995	0.000301205	0.00076864	0.000513347	0.000447427	0.000675676	0.000255689
				Shijiazhuang	0.00361011	0.00238663	0	0.004329	0.00114811	0.000888099	0.000698812	0.000597729	0.000789266	0.00103734	0.000717875	0.00109409	0.000522193	0.000773395	0.00332226	0.00242718	0.00105485	0.000763359	0.000495786	0.000436872	0.000552486	0.000566572	0.000442087	0.000344709	0.00108342	0.000625391	0.000550964	0.000646412	0.000286451
				Taiyuan	0.0019685	0.00153846	0.004329	0	0.0015625	0.000796813	0.000641026	0.000554939	0.000667557	0.00083682	0.000615764	0.000873362	0.000396668	0.000647668	0.0018797	0.0017331	0.000848176	0.000650618	0.000445831	0.000397614	0.000500751	0.000669792	0.000406504	0.000385654	0.0015361	0.00075358	0.000648088	0.000759878	0.000310655
				Hohehot	0.00149925	0.00124378	0.00114811	0.0015625	0	0.000710227	0.000583771	0.000511509	0.000469484	0.000547345	0.000443262	0.000562746	0.000302755	0.000373972	0.000859107	0.000734214	0.00052687	0.000443262	0.00033761	0.000309215	0.000379219	0.000468823	0.000322581	0.00030931	0.000774593	0.000874126	0.000735294	0.00147929	0.000329381
				Shenyang	0.00134953	0.00137363	0.000888099	0.000796813	0.000710227	0	0.00327869	0.00182815	0.000486855	0.000571102	0.000458716	0.000587889	0.00034188	0.0004649	0.000919118	0.000650195	0.000507099	0.000428449	0.000328839	0.000301841	0.000352858	0.000358551	0.000304321	0.000254777	0.000524659	0.00039185	0.000352237	0.000479846	0.000221484
				Changchun	0.000956023	0.000968054	0.000698812	0.000641026	0.000583771	0.00327869	0	0.00413223	0.000423908	0.000486381	0.000402414	0.000498504	0.000309598	0.000407166	0.000717875	0.000542594	0.000439174	0.000378931	0.000298864	0.000276396	0.000318573	0.000323206	0.000278474	0.000236407	0.000452284	0.000350018	0.000318066	0.000418585	0.000207469
				Harbin	0.000776398	0.000784314	0.000597729	0.000554939	0.000511509	0.00182815	0.00413223	0	0.000384468	0.000435161	0.000366703	0.00044484	0.000288018	0.000370645	0.000611621	0.000479616	0.000396983	0.000347102	0.000278707	0.000259067	0.00029577	0.00029976	0.000260892	0.000223614	0.000407664	0.000322685	0.000295334	0.000380084	0.00019755
				Shanghai	0.000683527	0.000754148	0.000789266	0.000667557	0.000469484	0.000486855	0.000423908	0.000384468	0	0.00330033	0.00497512	0.00162602	0.000847458	0.00118483	0.0010352	0.001002	0.000809717	0.0008285	0.000552486	0.000480307	0.000397456	0.000425351	0.000487092	0.000370508	0.000662691	0.000457666	0.000416493	0.000424628	0.000245278
				Nanjing	0.000862069	0.000977517	0.00103734	0.00083682	0.000547345	0.000571102	0.000486381	0.000435161	0.00330033	0	0.002331	0.00320513	0.000851789	0.00119332	0.0015083	0.00143885	0.000812348	0.000832639	0.000554324	0.000481696	0.000477783	0.000488281	0.000486855	0.000371333	0.000829187	0.00053135	0.000476644	0.000487329	0.000264971
				Hangzhou	0.000629327	0.000688705	0.000717875	0.000615764	0.000443262	0.000458716	0.000402414	0.000366703	0.00497512	0.002331	0	0.00221729	0.00102145	0.00155521	0.000915751	0.00088968	0.000831947	0.000994036	0.000621504	0.000531632	0.000431965	0.00039185	0.000539957	0.00040032	0.000611621	0.000432713	0.000395726	0.000403063	0.000246002
				Hefei	0.000931099	0.00102775	0.00109409	0.000873362	0.000562746	0.000587889	0.000498504	0.00044484	0.00162602	0.00320513	0.00221729	0	0.00083612	0.00209205	0.00163132	0.00155039	0.00084674	0.000815661	0.000546747	0.000452489	0.000489476	0.000500501	0.000481696	0.000322789	0.000865052	0.000545852	0.000488281	0.0004995	0.000268528
				Fuzhou	0.000428449	0.000455166	0.000522193	0.000396668	0.000302755	0.00034188	0.000309598	0.000288018	0.000847458	0.000851789	0.00102145	0.00083612	0	0.00160772	0.000544366	0.000606428	0.000987167	0.00101523	0.000629723	0.000537634	0.000434594	0.000356506	0.00054407	0.000403714	0.000418585	0.000326264	0.000304785	0.000309119	0.000201735
				Nanchang	0.000690131	0.000692521	0.000773395	0.000647668	0.000373972	0.0004649	0.000407166	0.000370645	0.00118483	0.00119332	0.00155521	0.00209205	0.00160772	0	0.000879507	0.00107875	0.00255754	0.00238663	0.000978474	0.000772798	0.000576369	0.000446628	0.000786164	0.000523286	0.000708215	0.000478927	0.000434028	0.00044287	0.000227739
				Jinan	0.00201207	0.00277778	0.00332226	0.0018797	0.000859107	0.000919118	0.000717875	0.000611621	0.0010352	0.0015083	0.000915751	0.00163132	0.000544366	0.000879507	0	0.0015015	0.000831947	0.000639386	0.000463822	0.000411862	0.000484496	0.000495295	0.000397456	0.000320616	0.000849618	0.000539665	0.000483325	0.000543478	0.000267023
				Zhengzhou	0.00145138	0.00120337	0.00242718	0.0017331	0.000734214	0.000650195	0.000542594	0.000479616	0.001002	0.00143885	0.00088968	0.00155039	0.000606428	0.00107875	0.0015015	0	0.00186567	0.00111359	0.000623053	0.000532765	0.000715308	0.000739098	0.000540541	0.000401768	0.00195695	0.00084246	0.000712758	0.00073692	0.000324781
				Wuchang	0.000816327	0.000731529	0.00105485	0.000848176	0.00052687	0.000507099	0.000439174	0.000396983	0.000809717	0.000812348	0.000831947	0.00084674	0.000987167	0.00255754	0.000831947	0.00186567	0	0.00276243	0.000935454	0.000745712	0.00081103	0.000575705	0.000761035	0.000512033	0.00095511	0.000580383	0.00051573	0.000528262	0.000276625
				Changsha	0.00063012	0.000578369	0.000763359	0.000650618	0.000443262	0.000428449	0.000378931	0.000347102	0.0008285	0.000832639	0.000994036	0.000815661	0.00101523	0.00238663	0.000639386	0.00111359	0.00276243	0	0.00141443	0.00102145	0.000704722	0.000520021	0.00104603	0.000626959	0.000711744	0.000480538	0.00043535	0.000444247	0.000251699
				Guangzhou	0.00043592	0.000410509	0.000495786	0.000445831	0.00033761	0.000328839	0.000298864	0.000278707	0.000552486	0.000554324	0.000621504	0.000546747	0.000629723	0.000978474	0.000463822	0.000623053	0.000935454	0.00141443	0	0.000761035	0.000494315	0.000395726	0.000641026	0.000454752	0.000473709	0.000358809	0.000333	0.000338181	0.000213721
				Nanning	0.000389712	0.000369276	0.000436872	0.000397614	0.000309215	0.000301841	0.000276396	0.000259067	0.000480307	0.000481696	0.000531632	0.000452489	0.000537634	0.000772798	0.000411862	0.000532765	0.000745712	0.00102145	0.000761035	0	0.000753012	0.000545852	0.00115607	0.000664894	0.000419639	0.000326904	0.000305344	0.000309693	0.000201979
				Chongqing	0.000479157	0.00044843	0.000552486	0.000500751	0.000379219	0.000352858	0.000318573	0.00029577	0.000397456	0.000477783	0.000431965	0.000489476	0.000434594	0.000576369	0.000484496	0.000715308	0.00081103	0.000704722	0.000494315	0.000753012	0	0.00198413	0.00215983	0.000907441	0.000742942	0.000596659	0.000528541	0.000541712	0.000283286
				Chengdu	0.000489716	0.000457666	0.000566572	0.000669792	0.000468823	0.000358551	0.000323206	0.00029976	0.000425351	0.000488281	0.00039185	0.000500501	0.000356506	0.000446628	0.000495295	0.000739098	0.000575705	0.000520021	0.000395726	0.000545852	0.00198413	0	0.00103413	0.000909091	0.00118765	0.000853242	0.000720461	0.000745156	0.000330469
				Guiyang	0.000393856	0.000372995	0.000442087	0.000406504	0.000322581	0.000304321	0.000278474	0.000260892	0.000487092	0.000486855	0.000539957	0.000481696	0.00054407	0.000786164	0.000397456	0.000540541	0.000761035	0.00104603	0.000641026	0.00115607	0.00215983	0.00103413	0	0.00156495	0.000552792	0.000467508	0.000424628	0.000433088	0.000250438
				Kunming	0.000314663	0.000301205	0.000344709	0.000385654	0.00030931	0.000254777	0.000236407	0.000223614	0.000370508	0.000371333	0.00040032	0.000322789	0.000403714	0.000523286	0.000320616	0.000401768	0.000512033	0.000626959	0.000454752	0.000664894	0.000907441	0.000909091	0.00156495	0	0.000514933	0.000440141	0.000401929	0.0004095	0.000242365
				Xi'an	0.000862813	0.00076864	0.00108342	0.0015361	0.000774593	0.000524659	0.000452284	0.000407664	0.000662691	0.000829187	0.000611621	0.000865052	0.000418585	0.000708215	0.000849618	0.00195695	0.00095511	0.000711744	0.000473709	0.000419639	0.000742942	0.00118765	0.000552792	0.000514933	0	0.00147929	0.00112108	0.00118203	0.000389408
				Lanzhou	0.000552181	0.000513347	0.000625391	0.00075358	0.000874126	0.00039185	0.000350018	0.000322685	0.000457666	0.00053135	0.000432713	0.000545852	0.000326264	0.000478927	0.000539665	0.00084246	0.000580383	0.000480538	0.000358809	0.000326904	0.000596659	0.000853242	0.000467508	0.000440141	0.00147929	0	0.00462963	0.00213675	0.000528541
				Xining	0.000478011	0.000447427	0.000550964	0.000648088	0.000735294	0.000352237	0.000318066	0.000295334	0.000416493	0.000476644	0.000395726	0.000488281	0.000304785	0.000434028	0.000483325	0.000712758	0.00051573	0.00043535	0.000333	0.000305344	0.000528541	0.000720461	0.000424628	0.000401929	0.00112108	0.00462963	0	0.00146199	0.000474383
				Yinchuan	0.000744602	0.000675676	0.000646412	0.000759878	0.00147929	0.000479846	0.000418585	0.000380084	0.000424628	0.000487329	0.000403063	0.0004995	0.000309119	0.00044287	0.000543478	0.00073692	0.000528262	0.000444247	0.000338181	0.000309693	0.000541712	0.000745156	0.000433088	0.0004095	0.00118203	0.00213675	0.00146199	0	0.000498008
				Urumchi	0.000265393	0.000255689	0.000286451	0.000310655	0.000329381	0.000221484	0.000207469	0.00019755	0.000245278	0.000264971	0.000246002	0.000268528	0.000201735	0.000227739	0.000267023	0.000324781	0.000276625	0.000251699	0.000213721	0.000201979	0.000283286	0.000330469	0.000250438	0.000242365	0.000389408	0.000528541	0.000474383	0.000498008	0
																																	0.629624
			W		Beijing	Tianjin	Shijiazhuang	Taiyuan	Hohehot	Shenyang	Changchun	Harbin	Shanghai	Nanjing	Hangzhou	Hefei	Fuzhou	Nanchang	Jinan	Zhengzhou	Wuchang	Changsha	Guangzhou	Nanning	Chongqing	Chengdu	Guiyang	Kunming	Xi'an	Lanzhou	Xining	Yinchuan	Urumchi
				Beijing	0	0.0115931	0.00573375	0.00312647	0.00238118	0.00214339	0.0015184	0.00123311	0.00108561	0.00136918	0.000999527	0.00147882	0.000680484	0.0010961	0.00319567	0.00230515	0.00129653	0.00100079	0.000692349	0.000618959	0.00076102	0.000777791	0.000625541	0.000499764	0.00137036	0.000877001	0.000759201	0.00118261	0.00042151
				Tianjin	0.0115931	0	0.00379057	0.00244346	0.00197543	0.00218166	0.00153751	0.00124569	0.00119777	0.00155254	0.00109384	0.00163232	0.000722917	0.0010999	0.0044118	0.00191125	0.00116185	0.000918594	0.000651991	0.000586503	0.000712219	0.000726887	0.000592409	0.000478388	0.00122079	0.000815323	0.000710626	0.00107314	0.000406098
				Shijiazhuang	0.00573375	0.00379057	0	0.00687554	0.00182348	0.00141052	0.00110989	0.000949342	0.00125355	0.00164756	0.00114016	0.00173769	0.000829373	0.00122834	0.00527657	0.00385497	0.00167537	0.0012124	0.000787431	0.000693862	0.000877486	0.000899858	0.000702144	0.000547483	0.00172075	0.000993276	0.000875068	0.00102666	0.000454955
				Taiyuan	0.00312647	0.00244346	0.00687554	0	0.00248164	0.00126554	0.00101811	0.000881381	0.00106025	0.00132908	0.000977986	0.00138712	0.000630008	0.00102866	0.00298543	0.0027526	0.00134712	0.00103334	0.000708091	0.000631511	0.000795317	0.0010638	0.00064563	0.000612514	0.00243971	0.00119687	0.00102933	0.00120688	0.000493398
				Hohehot	0.00238118	0.00197543	0.00182348	0.00248164	0	0.00112802	0.000927174	0.000812404	0.000745657	0.000869321	0.000704011	0.000893781	0.00048085	0.00059396	0.00136448	0.00116612	0.000836801	0.000704011	0.000536208	0.00049111	0.000602294	0.000744608	0.000512338	0.000491262	0.00123025	0.00138833	0.00116783	0.00234948	0.000523139
				Shenyang	0.00214339	0.00218166	0.00141052	0.00126554	0.00112802	0	0.00520737	0.00290356	0.000773247	0.000907053	0.000728555	0.000933715	0.000542991	0.000738377	0.00145979	0.00103267	0.0008054	0.000680484	0.000522279	0.000479399	0.000560427	0.000569469	0.000483338	0.000404649	0.000833289	0.000622355	0.00055944	0.000762116	0.000351772
				Changchun	0.0015184	0.00153751	0.00110989	0.00101811	0.000927174	0.00520737	0	0.00656301	0.000673272	0.000772495	0.000639134	0.000791749	0.000491718	0.000646681	0.00114016	0.000861774	0.000697518	0.000601837	0.000474671	0.000438985	0.000505973	0.000513332	0.000442286	0.000375473	0.00071834	0.000555915	0.000505168	0.000664818	0.000329512
				Harbin	0.00123311	0.00124569	0.000949342	0.000881381	0.000812404	0.00290356	0.00656301	0	0.00061063	0.000691144	0.000582416	0.000706516	0.000457445	0.000588676	0.000971406	0.00076175	0.000630508	0.000551284	0.000442656	0.000411463	0.000469757	0.000476094	0.000414362	0.000355154	0.000647472	0.000512504	0.000469063	0.000603667	0.000313759
				Shanghai	0.00108561	0.00119777	0.00125355	0.00106025	0.000745657	0.000773247	0.000673272	0.00061063	0	0.00524175	0.00790174	0.00258252	0.00134597	0.00188181	0.00164415	0.00159143	0.00128603	0.00131586	0.000877486	0.000762848	0.00063126	0.000675563	0.000773623	0.000588458	0.00105252	0.000726887	0.000661495	0.000674416	0.000389563
				Nanjing	0.00136918	0.00155254	0.00164756	0.00132908	0.000869321	0.000907053	0.000772495	0.000691144	0.00524175	0	0.00370221	0.00509054	0.00135285	0.00189529	0.00239555	0.00228525	0.00129021	0.00132244	0.000880404	0.000765053	0.000758839	0.000775512	0.000773247	0.000589769	0.00131696	0.000843916	0.00075703	0.000774	0.00042084
				Hangzhou	0.000999527	0.00109384	0.00114016	0.000977986	0.000704011	0.000728555	0.000639134	0.000582416	0.00790174	0.00370221	0	0.00352162	0.00162232	0.00247006	0.00145444	0.00141303	0.00132134	0.00157878	0.000987103	0.000844364	0.000686069	0.000622355	0.000857586	0.000635808	0.000971406	0.000687256	0.000628512	0.000640165	0.000390713
				Hefei	0.00147882	0.00163232	0.00173769	0.00138712	0.000893781	0.000933715	0.000791749	0.000706516	0.00258252	0.00509054	0.00352162	0	0.00132797	0.0033227	0.00259094	0.0024624	0.00134483	0.00129547	0.00086837	0.000718665	0.00077741	0.000794919	0.000765053	0.000512669	0.00137392	0.000866948	0.000775512	0.000793331	0.00042649
				Fuzhou	0.000680484	0.000722917	0.000829373	0.000630008	0.00048085	0.000542991	0.000491718	0.000457445	0.00134597	0.00135285	0.00162232	0.00132797	0	0.00255345	0.000864588	0.000963159	0.00156787	0.00161244	0.00100016	0.000853897	0.000690243	0.000566221	0.000864118	0.000641199	0.000664818	0.000518189	0.000484075	0.000490958	0.000320405
				Nanchang	0.0010961	0.0010999	0.00122834	0.00102866	0.00059396	0.000738377	0.000646681	0.000588676	0.00188181	0.00189529	0.00247006	0.0033227	0.00255345	0	0.00139688	0.00171332	0.00406202	0.00379057	0.00155406	0.00122739	0.000915417	0.000709356	0.00124862	0.000831109	0.00112482	0.000760656	0.000689344	0.000703388	0.000361706
				Jinan	0.00319567	0.0044118	0.00527657	0.00298543	0.00136448	0.00145979	0.00114016	0.000971406	0.00164415	0.00239555	0.00145444	0.00259094	0.000864588	0.00139688	0	0.00238476	0.00132134	0.0010155	0.000736665	0.000654139	0.0007695	0.000786651	0.00063126	0.000509217	0.0013494	0.000857123	0.000767641	0.000863179	0.000424099
				Zhengzhou	0.00230515	0.00191125	0.00385497	0.0027526	0.00116612	0.00103267	0.000861774	0.00076175	0.00159143	0.00228525	0.00141303	0.0024624	0.000963159	0.00171332	0.00238476	0	0.00296315	0.00176865	0.000989563	0.000846164	0.00113609	0.00117387	0.000858513	0.000638107	0.00310812	0.00133804	0.00113204	0.00117041	0.000515833
				Wuchang	0.00129653	0.00116185	0.00167537	0.00134712	0.000836801	0.0008054	0.000697518	0.000630508	0.00128603	0.00129021	0.00132134	0.00134483	0.00156787	0.00406202	0.00132134	0.00296315	0	0.00438743	0.00148573	0.00118438	0.00128812	0.000914363	0.00120871	0.000813236	0.00151695	0.000921793	0.000819107	0.000839012	0.00043935
				Changsha	0.00100079	0.000918594	0.0012124	0.00103334	0.000704011	0.000680484	0.000601837	0.000551284	0.00131586	0.00132244	0.00157878	0.00129547	0.00161244	0.00379057	0.0010155	0.00176865	0.00438743	0	0.00224646	0.00162232	0.00111927	0.000825923	0.00166135	0.000995767	0.00113043	0.000763214	0.000691445	0.000705575	0.000399761
				Guangzhou	0.000692349	0.000651991	0.000787431	0.000708091	0.000536208	0.000522279	0.000474671	0.000442656	0.000877486	0.000880404	0.000987103	0.00086837	0.00100016	0.00155406	0.000736665	0.000989563	0.00148573	0.00224646	0	0.00120871	0.000785096	0.000628512	0.00101811	0.00072226	0.000752368	0.000569878	0.000528887	0.000537115	0.000339442
				Nanning	0.000618959	0.000586503	0.000693862	0.000631511	0.00049111	0.000479399	0.000438985	0.000411463	0.000762848	0.000765053	0.000844364	0.000718665	0.000853897	0.00122739	0.000654139	0.000846164	0.00118438	0.00162232	0.00120871	0	0.00119597	0.000866948	0.00183613	0.00105602	0.000666491	0.000519205	0.000484962	0.00049187	0.000320794
				Chongqing	0.00076102	0.000712219	0.000877486	0.000795317	0.000602294	0.000560427	0.000505973	0.000469757	0.00063126	0.000758839	0.000686069	0.00077741	0.000690243	0.000915417	0.0007695	0.00113609	0.00128812	0.00111927	0.000785096	0.00119597	0	0.00315129	0.00343034	0.00144124	0.00117998	0.000947643	0.000839455	0.000860373	0.000449929
				Chengdu	0.000777791	0.000726887	0.000899858	0.0010638	0.000744608	0.000569469	0.000513332	0.000476094	0.000675563	0.000775512	0.000622355	0.000794919	0.000566221	0.000709356	0.000786651	0.00117387	0.000914363	0.000825923	0.000628512	0.000866948	0.00315129	0	0.00164245	0.00144386	0.00188628	0.00135516	0.00114427	0.00118349	0.000524867
				Guiyang	0.000625541	0.000592409	0.000702144	0.00064563	0.000512338	0.000483338	0.000442286	0.000414362	0.000773623	0.000773247	0.000857586	0.000765053	0.000864118	0.00124862	0.00063126	0.000858513	0.00120871	0.00166135	0.00101811	0.00183613	0.00343034	0.00164245	0	0.00248552	0.000877971	0.000742519	0.000674416	0.000687851	0.000397758
				Kunming	0.000499764	0.000478388	0.000547483	0.000612514	0.000491262	0.000404649	0.000375473	0.000355154	0.000588458	0.000589769	0.000635808	0.000512669	0.000641199	0.000831109	0.000509217	0.000638107	0.000813236	0.000995767	0.00072226	0.00105602	0.00144124	0.00144386	0.00248552	0	0.000817842	0.000699053	0.000638364	0.000650389	0.000384937
				Xi'an	0.00137036	0.00122079	0.00172075	0.00243971	0.00123025	0.000833289	0.00071834	0.000647472	0.00105252	0.00131696	0.000971406	0.00137392	0.000664818	0.00112482	0.0013494	0.00310812	0.00151695	0.00113043	0.000752368	0.000666491	0.00117998	0.00188628	0.000877971	0.000817842	0	0.00234948	0.00178055	0.00187736	0.000618477
				Lanzhou	0.000877001	0.000815323	0.000993276	0.00119687	0.00138833	0.000622355	0.000555915	0.000512504	0.000726887	0.000843916	0.000687256	0.000866948	0.000518189	0.000760656	0.000857123	0.00133804	0.000921793	0.000763214	0.000569878	0.000519205	0.000947643	0.00135516	0.000742519	0.000699053	0.00234948	0	0.007353	0.00339369	0.000839455
				Xining	0.000759201	0.000710626	0.000875068	0.00102933	0.00116783	0.00055944	0.000505168	0.000469063	0.000661495	0.00075703	0.000628512	0.000775512	0.000484075	0.000689344	0.000767641	0.00113204	0.000819107	0.000691445	0.000528887	0.000484962	0.000839455	0.00114427	0.000674416	0.000638364	0.00178055	0.007353	0	0.002322	0.000753439
				Yinchuan	0.00118261	0.00107314	0.00102666	0.00120688	0.00234948	0.000762116	0.000664818	0.000603667	0.000674416	0.000774	0.000640165	0.000793331	0.000490958	0.000703388	0.000863179	0.00117041	0.000839012	0.000705575	0.000537115	0.00049187	0.000860373	0.00118349	0.000687851	0.000650389	0.00187736	0.00339369	0.002322	0	0.000790961
				Urumchi	0.00042151	0.000406098	0.000454955	0.000493398	0.000523139	0.000351772	0.000329512	0.000313759	0.000389563	0.00042084	0.000390713	0.00042649	0.000320405	0.000361706	0.000424099	0.000515833	0.00043935	0.000399761	0.000339442	0.000320794	0.000449929	0.000524867	0.000397758	0.000384937	0.000618477	0.000839455	0.000753439	0.000790961	0
																																	1

## Sheet: Moran-Power
City	Population size in 2000	z		Distance	Beijing	Tianjin	Shijiazhuang	Taiyuan	Hohehot	Shenyang	Changchun	Harbin	Shanghai	Nanjing	Hangzhou	Hefei	Fuzhou	Nanchang	Jinan	Zhengzhou	Wuchang	Changsha	Guangzhou	Nanning	Chongqing	Chengdu	Guiyang	Kunming	Xi'an	Lanzhou	Xining	Yinchuan	Urumchi
Beijing	9496688	2.28758		Beijing	0	137	277	508	667	741	1046	1288	1463	1160	1589	1074	2334	1449	497	689	1225	1587	2294	2566	2087	2042	2539	3178	1159	1811	2092	1343	3768
Tianjin	5313702	0.715303		Tianjin	137	0	419	650	804	728	1033	1275	1326	1023	1452	973	2197	1444	360	831	1367	1729	2436	2708	2230	2185	2681	3320	1301	1948	2235	1480	3911
Shijiazhuang	1930579	-0.556324		Shijiazhuang	277	419	0	231	871	1126	1431	1673	1267	964	1393	914	1915	1293	301	412	948	1310	2017	2289	1810	1765	2262	2901	923	1599	1815	1547	3491
Taiyuan	2538336	-0.327884		Taiyuan	508	650	231	0	640	1255	1560	1802	1498	1195	1624	1145	2521	1544	532	577	1179	1537	2243	2515	1997	1493	2460	2593	651	1327	1543	1316	3219
Hohehot	990954	-0.909504		Hohehot	667	804	871	640	0	1408	1713	1955	2130	1827	2256	1777	3303	2674	1164	1362	1898	2256	2962	3234	2637	2133	3100	3233	1291	1144	1360	676	3036
Shenyang	4344933	0.351168		Shenyang	741	728	1126	1255	1408	0	305	547	2054	1751	2180	1701	2925	2151	1088	1538	1972	2334	3041	3313	2834	2789	3286	3925	1906	2552	2839	2084	4515
Changchun	2696430	-0.268461		Changchun	1046	1033	1431	1560	1713	305	0	242	2359	2056	2485	2006	3230	2456	1393	1843	2277	2639	3346	3618	3139	3094	3591	4230	2211	2857	3144	2389	4820
Harbin	3455065	0.0166902		Harbin	1288	1275	1673	1802	1955	547	242	0	2601	2298	2727	2248	3472	2698	1635	2085	2519	2881	3588	3860	3381	3336	3833	4472	2453	3099	3386	2631	5062
Shanghai	12720701	3.4994		Shanghai	1463	1326	1267	1498	2130	2054	2359	2601	0	303	201	615	1180	844	966	998	1235	1207	1810	2082	2516	2351	2053	2699	1509	2185	2401	2355	4077
Nanjing	3447184	0.0137279		Nanjing	1160	1023	964	1195	1827	1751	2056	2298	303	0	429	312	1174	838	663	695	1231	1201	1804	2076	2093	2048	2054	2693	1206	1882	2098	2052	3774
Hangzhou	2451319	-0.360591		Hangzhou	1589	1452	1393	1624	2256	2180	2485	2727	201	429	0	451	979	643	1092	1124	1202	1006	1609	1881	2315	2552	1852	2498	1635	2311	2527	2481	4065
Hefei	1462828	-0.732139		Hefei	1074	973	914	1145	1777	1701	2006	2248	615	312	451	0	1196	478	613	645	1181	1226	1829	2210	2043	1998	2076	3098	1156	1832	2048	2002	3724
Fuzhou	1981083	-0.537341		Fuzhou	2334	2197	1915	2521	3303	2925	3230	3472	1180	1174	979	1196	0	622	1837	1649	1013	985	1588	1860	2301	2805	1838	2477	2389	3065	3281	3235	4957
Nanchang	1669679	-0.654389		Nanchang	1449	1444	1293	1544	2674	2151	2456	2698	844	838	643	478	622	0	1137	927	391	419	1022	1294	1735	2239	1272	1911	1412	2088	2304	2258	4391
Jinan	2585986	-0.309974		Jinan	497	360	301	532	1164	1088	1393	1635	966	663	1092	613	1837	1137	0	666	1202	1564	2156	2428	2064	2019	2516	3119	1177	1853	2069	1840	3745
Zhengzhou	2490838	-0.345737		Zhengzhou	689	831	412	577	1362	1538	1843	2085	998	695	1124	645	1649	927	666	0	536	898	1605	1877	1398	1353	1850	2489	511	1187	1403	1357	3079
Wuchang	6559426	1.18354		Wuchang	1225	1367	948	1179	1898	1972	2277	2519	1235	1231	1202	1181	1013	391	1202	536	0	362	1069	1341	1233	1737	1314	1953	1047	1723	1939	1893	3615
Changsha	2122873	-0.484046		Changsha	1587	1729	1310	1537	2256	2334	2639	2881	1207	1201	1006	1226	985	419	1564	898	362	0	707	979	1419	1923	956	1595	1405	2081	2297	2251	3973
Guangzhou	6868736	1.2998		Guangzhou	2294	2436	2017	2243	2962	3041	3346	3588	1810	1804	1609	1829	1588	1022	2156	1605	1069	707	0	1314	2023	2527	1560	2199	2111	2787	3003	2957	4679
Nanning	1354576	-0.772828		Nanning	2566	2708	2289	2515	3234	3313	3618	3860	2082	2076	1881	2210	1860	1294	2428	1877	1341	979	1314	0	1328	1832	865	1504	2383	3059	3275	3229	4951
Chongqing	5676406	0.851634		Chongqing	2087	2230	1810	1997	2637	2834	3139	3381	2516	2093	2315	2043	2301	1735	2064	1398	1233	1419	2023	1328	0	504	463	1102	1346	1676	1892	1846	3530
Chengdu	3821511	0.154428		Chengdu	2042	2185	1765	1493	2133	2789	3094	3336	2351	2048	2552	1998	2805	2239	2019	1353	1737	1923	2527	1832	504	0	967	1100	842	1172	1388	1342	3026
Guiyang	1829565	-0.594292		Guiyang	2539	2681	2262	2460	3100	3286	3591	3833	2053	2054	1852	2076	1838	1272	2516	1850	1314	956	1560	865	463	967	0	639	1809	2139	2355	2309	3993
Kunming	2478580	-0.350345		Kunming	3178	3320	2901	2593	3233	3925	4230	4472	2699	2693	2498	3098	2477	1911	3119	2489	1953	1595	2199	1504	1102	1100	639	0	1942	2272	2488	2442	4126
Xi'an	3645322	0.0882028		Xi'an	1159	1301	923	651	1291	1906	2211	2453	1509	1206	1635	1156	2389	1412	1177	511	1047	1405	2111	2383	1346	842	1809	1942	0	676	892	846	2568
Lanzhou	1815338	-0.59964		Lanzhou	1811	1948	1599	1327	1144	2552	2857	3099	2185	1882	2311	1832	3065	2088	1853	1187	1723	2081	2787	3059	1676	1172	2139	2272	676	0	216	468	1892
Xining	854466	-0.960806		Xining	2092	2235	1815	1543	1360	2839	3144	3386	2401	2098	2527	2048	3281	2304	2069	1403	1939	2297	3003	3275	1892	1388	2355	2488	892	216	0	684	2108
Yinchuan	578362	-1.06459		Yinchuan	1343	1480	1547	1316	676	2084	2389	2631	2355	2052	2481	2002	3235	2258	1840	1357	1893	2251	2957	3229	1846	1342	2309	2442	846	468	684	0	2008
Urumchi	1727712	-0.632576		Urumchi	3768	3911	3491	3219	3036	4515	4820	5062	4077	3774	4065	3724	4957	4391	3745	3079	3615	3973	4679	4951	3530	3026	3993	4126	2568	1892	2108	2008	0
average	3.41066e+06	1.18679e-16
stdevp	2.66047e+06	1		V	Beijing	Tianjin	Shijiazhuang	Taiyuan	Hohehot	Shenyang	Changchun	Harbin	Shanghai	Nanjing	Hangzhou	Hefei	Fuzhou	Nanchang	Jinan	Zhengzhou	Wuchang	Changsha	Guangzhou	Nanning	Chongqing	Chengdu	Guiyang	Kunming	Xi'an	Lanzhou	Xining	Yinchuan	Urumchi
				Beijing	0	0.00729927	0.00361011	0.0019685	0.00149925	0.00134953	0.000956023	0.000776398	0.000683527	0.000862069	0.000629327	0.000931099	0.000428449	0.000690131	0.00201207	0.00145138	0.000816327	0.00063012	0.00043592	0.000389712	0.000479157	0.000489716	0.000393856	0.000314663	0.000862813	0.000552181	0.000478011	0.000744602	0.000265393
Moran's I	-0.0314565			Tianjin	0.00729927	0	0.00238663	0.00153846	0.00124378	0.00137363	0.000968054	0.000784314	0.000754148	0.000977517	0.000688705	0.00102775	0.000455166	0.000692521	0.00277778	0.00120337	0.000731529	0.000578369	0.000410509	0.000369276	0.00044843	0.000457666	0.000372995	0.000301205	0.00076864	0.000513347	0.000447427	0.000675676	0.000255689
				Shijiazhuang	0.00361011	0.00238663	0	0.004329	0.00114811	0.000888099	0.000698812	0.000597729	0.000789266	0.00103734	0.000717875	0.00109409	0.000522193	0.000773395	0.00332226	0.00242718	0.00105485	0.000763359	0.000495786	0.000436872	0.000552486	0.000566572	0.000442087	0.000344709	0.00108342	0.000625391	0.000550964	0.000646412	0.000286451
				Taiyuan	0.0019685	0.00153846	0.004329	0	0.0015625	0.000796813	0.000641026	0.000554939	0.000667557	0.00083682	0.000615764	0.000873362	0.000396668	0.000647668	0.0018797	0.0017331	0.000848176	0.000650618	0.000445831	0.000397614	0.000500751	0.000669792	0.000406504	0.000385654	0.0015361	0.00075358	0.000648088	0.000759878	0.000310655
				Hohehot	0.00149925	0.00124378	0.00114811	0.0015625	0	0.000710227	0.000583771	0.000511509	0.000469484	0.000547345	0.000443262	0.000562746	0.000302755	0.000373972	0.000859107	0.000734214	0.00052687	0.000443262	0.00033761	0.000309215	0.000379219	0.000468823	0.000322581	0.00030931	0.000774593	0.000874126	0.000735294	0.00147929	0.000329381
				Shenyang	0.00134953	0.00137363	0.000888099	0.000796813	0.000710227	0	0.00327869	0.00182815	0.000486855	0.000571102	0.000458716	0.000587889	0.00034188	0.0004649	0.000919118	0.000650195	0.000507099	0.000428449	0.000328839	0.000301841	0.000352858	0.000358551	0.000304321	0.000254777	0.000524659	0.00039185	0.000352237	0.000479846	0.000221484
				Changchun	0.000956023	0.000968054	0.000698812	0.000641026	0.000583771	0.00327869	0	0.00413223	0.000423908	0.000486381	0.000402414	0.000498504	0.000309598	0.000407166	0.000717875	0.000542594	0.000439174	0.000378931	0.000298864	0.000276396	0.000318573	0.000323206	0.000278474	0.000236407	0.000452284	0.000350018	0.000318066	0.000418585	0.000207469
				Harbin	0.000776398	0.000784314	0.000597729	0.000554939	0.000511509	0.00182815	0.00413223	0	0.000384468	0.000435161	0.000366703	0.00044484	0.000288018	0.000370645	0.000611621	0.000479616	0.000396983	0.000347102	0.000278707	0.000259067	0.00029577	0.00029976	0.000260892	0.000223614	0.000407664	0.000322685	0.000295334	0.000380084	0.00019755
				Shanghai	0.000683527	0.000754148	0.000789266	0.000667557	0.000469484	0.000486855	0.000423908	0.000384468	0	0.00330033	0.00497512	0.00162602	0.000847458	0.00118483	0.0010352	0.001002	0.000809717	0.0008285	0.000552486	0.000480307	0.000397456	0.000425351	0.000487092	0.000370508	0.000662691	0.000457666	0.000416493	0.000424628	0.000245278
				Nanjing	0.000862069	0.000977517	0.00103734	0.00083682	0.000547345	0.000571102	0.000486381	0.000435161	0.00330033	0	0.002331	0.00320513	0.000851789	0.00119332	0.0015083	0.00143885	0.000812348	0.000832639	0.000554324	0.000481696	0.000477783	0.000488281	0.000486855	0.000371333	0.000829187	0.00053135	0.000476644	0.000487329	0.000264971
				Hangzhou	0.000629327	0.000688705	0.000717875	0.000615764	0.000443262	0.000458716	0.000402414	0.000366703	0.00497512	0.002331	0	0.00221729	0.00102145	0.00155521	0.000915751	0.00088968	0.000831947	0.000994036	0.000621504	0.000531632	0.000431965	0.00039185	0.000539957	0.00040032	0.000611621	0.000432713	0.000395726	0.000403063	0.000246002
				Hefei	0.000931099	0.00102775	0.00109409	0.000873362	0.000562746	0.000587889	0.000498504	0.00044484	0.00162602	0.00320513	0.00221729	0	0.00083612	0.00209205	0.00163132	0.00155039	0.00084674	0.000815661	0.000546747	0.000452489	0.000489476	0.000500501	0.000481696	0.000322789	0.000865052	0.000545852	0.000488281	0.0004995	0.000268528
				Fuzhou	0.000428449	0.000455166	0.000522193	0.000396668	0.000302755	0.00034188	0.000309598	0.000288018	0.000847458	0.000851789	0.00102145	0.00083612	0	0.00160772	0.000544366	0.000606428	0.000987167	0.00101523	0.000629723	0.000537634	0.000434594	0.000356506	0.00054407	0.000403714	0.000418585	0.000326264	0.000304785	0.000309119	0.000201735
				Nanchang	0.000690131	0.000692521	0.000773395	0.000647668	0.000373972	0.0004649	0.000407166	0.000370645	0.00118483	0.00119332	0.00155521	0.00209205	0.00160772	0	0.000879507	0.00107875	0.00255754	0.00238663	0.000978474	0.000772798	0.000576369	0.000446628	0.000786164	0.000523286	0.000708215	0.000478927	0.000434028	0.00044287	0.000227739
				Jinan	0.00201207	0.00277778	0.00332226	0.0018797	0.000859107	0.000919118	0.000717875	0.000611621	0.0010352	0.0015083	0.000915751	0.00163132	0.000544366	0.000879507	0	0.0015015	0.000831947	0.000639386	0.000463822	0.000411862	0.000484496	0.000495295	0.000397456	0.000320616	0.000849618	0.000539665	0.000483325	0.000543478	0.000267023
				Zhengzhou	0.00145138	0.00120337	0.00242718	0.0017331	0.000734214	0.000650195	0.000542594	0.000479616	0.001002	0.00143885	0.00088968	0.00155039	0.000606428	0.00107875	0.0015015	0	0.00186567	0.00111359	0.000623053	0.000532765	0.000715308	0.000739098	0.000540541	0.000401768	0.00195695	0.00084246	0.000712758	0.00073692	0.000324781
				Wuchang	0.000816327	0.000731529	0.00105485	0.000848176	0.00052687	0.000507099	0.000439174	0.000396983	0.000809717	0.000812348	0.000831947	0.00084674	0.000987167	0.00255754	0.000831947	0.00186567	0	0.00276243	0.000935454	0.000745712	0.00081103	0.000575705	0.000761035	0.000512033	0.00095511	0.000580383	0.00051573	0.000528262	0.000276625
				Changsha	0.00063012	0.000578369	0.000763359	0.000650618	0.000443262	0.000428449	0.000378931	0.000347102	0.0008285	0.000832639	0.000994036	0.000815661	0.00101523	0.00238663	0.000639386	0.00111359	0.00276243	0	0.00141443	0.00102145	0.000704722	0.000520021	0.00104603	0.000626959	0.000711744	0.000480538	0.00043535	0.000444247	0.000251699
				Guangzhou	0.00043592	0.000410509	0.000495786	0.000445831	0.00033761	0.000328839	0.000298864	0.000278707	0.000552486	0.000554324	0.000621504	0.000546747	0.000629723	0.000978474	0.000463822	0.000623053	0.000935454	0.00141443	0	0.000761035	0.000494315	0.000395726	0.000641026	0.000454752	0.000473709	0.000358809	0.000333	0.000338181	0.000213721
				Nanning	0.000389712	0.000369276	0.000436872	0.000397614	0.000309215	0.000301841	0.000276396	0.000259067	0.000480307	0.000481696	0.000531632	0.000452489	0.000537634	0.000772798	0.000411862	0.000532765	0.000745712	0.00102145	0.000761035	0	0.000753012	0.000545852	0.00115607	0.000664894	0.000419639	0.000326904	0.000305344	0.000309693	0.000201979
				Chongqing	0.000479157	0.00044843	0.000552486	0.000500751	0.000379219	0.000352858	0.000318573	0.00029577	0.000397456	0.000477783	0.000431965	0.000489476	0.000434594	0.000576369	0.000484496	0.000715308	0.00081103	0.000704722	0.000494315	0.000753012	0	0.00198413	0.00215983	0.000907441	0.000742942	0.000596659	0.000528541	0.000541712	0.000283286
				Chengdu	0.000489716	0.000457666	0.000566572	0.000669792	0.000468823	0.000358551	0.000323206	0.00029976	0.000425351	0.000488281	0.00039185	0.000500501	0.000356506	0.000446628	0.000495295	0.000739098	0.000575705	0.000520021	0.000395726	0.000545852	0.00198413	0	0.00103413	0.000909091	0.00118765	0.000853242	0.000720461	0.000745156	0.000330469
				Guiyang	0.000393856	0.000372995	0.000442087	0.000406504	0.000322581	0.000304321	0.000278474	0.000260892	0.000487092	0.000486855	0.000539957	0.000481696	0.00054407	0.000786164	0.000397456	0.000540541	0.000761035	0.00104603	0.000641026	0.00115607	0.00215983	0.00103413	0	0.00156495	0.000552792	0.000467508	0.000424628	0.000433088	0.000250438
				Kunming	0.000314663	0.000301205	0.000344709	0.000385654	0.00030931	0.000254777	0.000236407	0.000223614	0.000370508	0.000371333	0.00040032	0.000322789	0.000403714	0.000523286	0.000320616	0.000401768	0.000512033	0.000626959	0.000454752	0.000664894	0.000907441	0.000909091	0.00156495	0	0.000514933	0.000440141	0.000401929	0.0004095	0.000242365
				Xi'an	0.000862813	0.00076864	0.00108342	0.0015361	0.000774593	0.000524659	0.000452284	0.000407664	0.000662691	0.000829187	0.000611621	0.000865052	0.000418585	0.000708215	0.000849618	0.00195695	0.00095511	0.000711744	0.000473709	0.000419639	0.000742942	0.00118765	0.000552792	0.000514933	0	0.00147929	0.00112108	0.00118203	0.000389408
				Lanzhou	0.000552181	0.000513347	0.000625391	0.00075358	0.000874126	0.00039185	0.000350018	0.000322685	0.000457666	0.00053135	0.000432713	0.000545852	0.000326264	0.000478927	0.000539665	0.00084246	0.000580383	0.000480538	0.000358809	0.000326904	0.000596659	0.000853242	0.000467508	0.000440141	0.00147929	0	0.00462963	0.00213675	0.000528541
				Xining	0.000478011	0.000447427	0.000550964	0.000648088	0.000735294	0.000352237	0.000318066	0.000295334	0.000416493	0.000476644	0.000395726	0.000488281	0.000304785	0.000434028	0.000483325	0.000712758	0.00051573	0.00043535	0.000333	0.000305344	0.000528541	0.000720461	0.000424628	0.000401929	0.00112108	0.00462963	0	0.00146199	0.000474383
				Yinchuan	0.000744602	0.000675676	0.000646412	0.000759878	0.00147929	0.000479846	0.000418585	0.000380084	0.000424628	0.000487329	0.000403063	0.0004995	0.000309119	0.00044287	0.000543478	0.00073692	0.000528262	0.000444247	0.000338181	0.000309693	0.000541712	0.000745156	0.000433088	0.0004095	0.00118203	0.00213675	0.00146199	0	0.000498008
				Urumchi	0.000265393	0.000255689	0.000286451	0.000310655	0.000329381	0.000221484	0.000207469	0.00019755	0.000245278	0.000264971	0.000246002	0.000268528	0.000201735	0.000227739	0.000267023	0.000324781	0.000276625	0.000251699	0.000213721	0.000201979	0.000283286	0.000330469	0.000250438	0.000242365	0.000389408	0.000528541	0.000474383	0.000498008	0
																																	0.629624
			z	W	Beijing	Tianjin	Shijiazhuang	Taiyuan	Hohehot	Shenyang	Changchun	Harbin	Shanghai	Nanjing	Hangzhou	Hefei	Fuzhou	Nanchang	Jinan	Zhengzhou	Wuchang	Changsha	Guangzhou	Nanning	Chongqing	Chengdu	Guiyang	Kunming	Xi'an	Lanzhou	Xining	Yinchuan	Urumchi	f*	f	City	z	f	f*	ef	z*	ez
			2.28758	Beijing	0	0.0115931	0.00573375	0.00312647	0.00238118	0.00214339	0.0015184	0.00123311	0.00108561	0.00136918	0.000999527	0.00147882	0.000680484	0.0010961	0.00319567	0.00230515	0.00129653	0.00100079	0.000692349	0.000618959	0.00076102	0.000777791	0.000625541	0.000499764	0.00137036	0.000877001	0.000759201	0.00118261	0.00042151	-0.0719592	0.0236247	Beijing	2.28758	0.0236247	-0.0719592	0.095584	-0.751028	3.03861
			0.715303	Tianjin	0.0115931	0	0.00379057	0.00244346	0.00197543	0.00218166	0.00153751	0.00124569	0.00119777	0.00155254	0.00109384	0.00163232	0.000722917	0.0010999	0.0044118	0.00191125	0.00116185	0.000918594	0.000651991	0.000586503	0.000712219	0.000726887	0.000592409	0.000478388	0.00122079	0.000815323	0.000710626	0.00107314	0.000406098	-0.0225009	0.601307	Tianjin	0.715303	0.601307	-0.0225009	0.623808	-19.1155	19.8308
			-0.556324	Shijiazhuang	0.00573375	0.00379057	0	0.00687554	0.00182348	0.00141052	0.00110989	0.000949342	0.00125355	0.00164756	0.00114016	0.00173769	0.000829373	0.00122834	0.00527657	0.00385497	0.00167537	0.0012124	0.000787431	0.000693862	0.000877486	0.000899858	0.000702144	0.000547483	0.00172075	0.000993276	0.000875068	0.00102666	0.000454955	0.0175	0.293808	Shijiazhuang	-0.556324	0.293808	0.0175	0.276308	-9.34011	8.78379
			-0.327884	Taiyuan	0.00312647	0.00244346	0.00687554	0	0.00248164	0.00126554	0.00101811	0.000881381	0.00106025	0.00132908	0.000977986	0.00138712	0.000630008	0.00102866	0.00298543	0.0027526	0.00134712	0.00103334	0.000708091	0.000631511	0.000795317	0.0010638	0.00064563	0.000612514	0.00243971	0.00119687	0.00102933	0.00120688	0.000493398	0.0103141	0.0335379	Taiyuan	-0.327884	0.0335379	0.0103141	0.0232238	-1.06617	0.738283
			-0.909504	Hohehot	0.00238118	0.00197543	0.00182348	0.00248164	0	0.00112802	0.000927174	0.000812404	0.000745657	0.000869321	0.000704011	0.000893781	0.00048085	0.00059396	0.00136448	0.00116612	0.000836801	0.000704011	0.000536208	0.00049111	0.000602294	0.000744608	0.000512338	0.000491262	0.00123025	0.00138833	0.00116783	0.00234948	0.000523139	0.0286098	0.0543126	Hohehot	-0.909504	0.0543126	0.0286098	0.0257028	-1.72659	0.817088
			0.351168	Shenyang	0.00214339	0.00218166	0.00141052	0.00126554	0.00112802	0	0.00520737	0.00290356	0.000773247	0.000907053	0.000728555	0.000933715	0.000542991	0.000738377	0.00145979	0.00103267	0.0008054	0.000680484	0.000522279	0.000479399	0.000560427	0.000569469	0.000483338	0.000404649	0.000833289	0.000622355	0.00055944	0.000762116	0.000351772	-0.0110465	0.0659312	Shenyang	0.351168	0.0659312	-0.0110465	0.0769777	-2.09595	2.44711
			-0.268461	Changchun	0.0015184	0.00153751	0.00110989	0.00101811	0.000927174	0.00520737	0	0.00656301	0.000673272	0.000772495	0.000639134	0.000791749	0.000491718	0.000646681	0.00114016	0.000861774	0.000697518	0.000601837	0.000474671	0.000438985	0.000505973	0.000513332	0.000442286	0.000375473	0.00071834	0.000555915	0.000505168	0.000664818	0.000329512	0.00844484	0.121534	Changchun	-0.268461	0.121534	0.00844484	0.113089	-3.86354	3.59508
			0.0166902	Harbin	0.00123311	0.00124569	0.000949342	0.000881381	0.000812404	0.00290356	0.00656301	0	0.00061063	0.000691144	0.000582416	0.000706516	0.000457445	0.000588676	0.000971406	0.00076175	0.000630508	0.000551284	0.000442656	0.000411463	0.000469757	0.000476094	0.000414362	0.000355154	0.000647472	0.000512504	0.000469063	0.000603667	0.000313759	-0.000525015	0.0271084	Harbin	0.0166902	0.0271084	-0.000525015	0.0276334	-0.861774	0.878464
			3.4994	Shanghai	0.00108561	0.00119777	0.00125355	0.00106025	0.000745657	0.000773247	0.000673272	0.00061063	0	0.00524175	0.00790174	0.00258252	0.00134597	0.00188181	0.00164415	0.00159143	0.00128603	0.00131586	0.000877486	0.000762848	0.00063126	0.000675563	0.000773623	0.000588458	0.00105252	0.000726887	0.000661495	0.000674416	0.000389563	-0.110079	-0.188371	Shanghai	3.4994	-0.188371	-0.110079	-0.0782917	5.98828	-2.48889
			0.0137279	Nanjing	0.00136918	0.00155254	0.00164756	0.00132908	0.000869321	0.000907053	0.000772495	0.000691144	0.00524175	0	0.00370221	0.00509054	0.00135285	0.00189529	0.00239555	0.00228525	0.00129021	0.00132244	0.000880404	0.000765053	0.000758839	0.000775512	0.000773247	0.000589769	0.00131696	0.000843916	0.00075703	0.000774	0.00042084	-0.000431833	0.328739	Nanjing	0.0137279	0.328739	-0.000431833	0.329171	-10.4506	10.4643
			-0.360591	Hangzhou	0.000999527	0.00109384	0.00114016	0.000977986	0.000704011	0.000728555	0.000639134	0.000582416	0.00790174	0.00370221	0	0.00352162	0.00162232	0.00247006	0.00145444	0.00141303	0.00132134	0.00157878	0.000987103	0.000844364	0.000686069	0.000622355	0.000857586	0.000635808	0.000971406	0.000687256	0.000628512	0.000640165	0.000390713	0.011343	0.660711	Hangzhou	-0.360591	0.660711	0.011343	0.649368	-21.0039	20.6433
			-0.732139	Hefei	0.00147882	0.00163232	0.00173769	0.00138712	0.000893781	0.000933715	0.000791749	0.000706516	0.00258252	0.00509054	0.00352162	0	0.00132797	0.0033227	0.00259094	0.0024624	0.00134483	0.00129547	0.00086837	0.000718665	0.00077741	0.000794919	0.000765053	0.000512669	0.00137392	0.000866948	0.000775512	0.000793331	0.00042649	0.0230306	0.149884	Hefei	-0.732139	0.149884	0.0230306	0.126853	-4.7648	4.03266
			-0.537341	Fuzhou	0.000680484	0.000722917	0.000829373	0.000630008	0.00048085	0.000542991	0.000491718	0.000457445	0.00134597	0.00135285	0.00162232	0.00132797	0	0.00255345	0.000864588	0.000963159	0.00156787	0.00161244	0.00100016	0.000853897	0.000690243	0.000566221	0.000864118	0.000641199	0.000664818	0.000518189	0.000484075	0.000490958	0.000320405	0.0169029	0.0621764	Fuzhou	-0.537341	0.0621764	0.0169029	0.0452735	-1.97658	1.43924
			-0.654389	Nanchang	0.0010961	0.0010999	0.00122834	0.00102866	0.00059396	0.000738377	0.000646681	0.000588676	0.00188181	0.00189529	0.00247006	0.0033227	0.00255345	0	0.00139688	0.00171332	0.00406202	0.00379057	0.00155406	0.00122739	0.000915417	0.000709356	0.00124862	0.000831109	0.00112482	0.000760656	0.000689344	0.000703388	0.000361706	0.0205848	0.134052	Nanchang	-0.654389	0.134052	0.0205848	0.113467	-4.2615	3.60711
			-0.309974	Jinan	0.00319567	0.0044118	0.00527657	0.00298543	0.00136448	0.00145979	0.00114016	0.000971406	0.00164415	0.00239555	0.00145444	0.00259094	0.000864588	0.00139688	0	0.00238476	0.00132134	0.0010155	0.000736665	0.000654139	0.0007695	0.000786651	0.00063126	0.000509217	0.0013494	0.000857123	0.000767641	0.000863179	0.000424099	0.0097507	0.177573	Jinan	-0.309974	0.177573	0.0097507	0.167822	-5.64503	5.33506
			-0.345737	Zhengzhou	0.00230515	0.00191125	0.00385497	0.0027526	0.00116612	0.00103267	0.000861774	0.00076175	0.00159143	0.00228525	0.00141303	0.0024624	0.000963159	0.00171332	0.00238476	0	0.00296315	0.00176865	0.000989563	0.000846164	0.00113609	0.00117387	0.000858513	0.000638107	0.00310812	0.00133804	0.00113204	0.00117041	0.000515833	0.0108757	0.118807	Zhengzhou	-0.345737	0.118807	0.0108757	0.107932	-3.77687	3.43113
			1.18354	Wuchang	0.00129653	0.00116185	0.00167537	0.00134712	0.000836801	0.0008054	0.000697518	0.000630508	0.00128603	0.00129021	0.00132134	0.00134483	0.00156787	0.00406202	0.00132134	0.00296315	0	0.00438743	0.00148573	0.00118438	0.00128812	0.000914363	0.00120871	0.000813236	0.00151695	0.000921793	0.000819107	0.000839012	0.00043935	-0.03723	-0.097423	Wuchang	1.18354	-0.097423	-0.03723	-0.060193	3.09707	-1.91353
			-0.484046	Changsha	0.00100079	0.000918594	0.0012124	0.00103334	0.000704011	0.000680484	0.000601837	0.000551284	0.00131586	0.00132244	0.00157878	0.00129547	0.00161244	0.00379057	0.0010155	0.00176865	0.00438743	0	0.00224646	0.00162232	0.00111927	0.000825923	0.00166135	0.000995767	0.00113043	0.000763214	0.000691445	0.000705575	0.000399761	0.0152264	0.138866	Changsha	-0.484046	0.138866	0.0152264	0.123639	-4.41453	3.93049
			1.2998	Guangzhou	0.000692349	0.000651991	0.000787431	0.000708091	0.000536208	0.000522279	0.000474671	0.000442656	0.000877486	0.000880404	0.000987103	0.00086837	0.00100016	0.00155406	0.000736665	0.000989563	0.00148573	0.00224646	0	0.00120871	0.000785096	0.000628512	0.00101811	0.00072226	0.000752368	0.000569878	0.000528887	0.000537115	0.000339442	-0.0408872	-0.0291091	Guangzhou	1.2998	-0.0291091	-0.0408872	0.0117781	0.925374	0.374425
			-0.772828	Nanning	0.000618959	0.000586503	0.000693862	0.000631511	0.00049111	0.000479399	0.000438985	0.000411463	0.000762848	0.000765053	0.000844364	0.000718665	0.000853897	0.00122739	0.000654139	0.000846164	0.00118438	0.00162232	0.00120871	0	0.00119597	0.000866948	0.00183613	0.00105602	0.000666491	0.000519205	0.000484962	0.00049187	0.000320794	0.0243105	0.0399864	Nanning	-0.772828	0.0399864	0.0243105	0.0156759	-1.27116	0.498335
			0.851634	Chongqing	0.00076102	0.000712219	0.000877486	0.000795317	0.000602294	0.000560427	0.000505973	0.000469757	0.00063126	0.000758839	0.000686069	0.00077741	0.000690243	0.000915417	0.0007695	0.00113609	0.00128812	0.00111927	0.000785096	0.00119597	0	0.00315129	0.00343034	0.00144124	0.00117998	0.000947643	0.000839455	0.000860373	0.000449929	-0.0267894	-0.0761303	Chongqing	0.851634	-0.0761303	-0.0267894	-0.0493409	2.42018	-1.56854
			0.154428	Chengdu	0.000777791	0.000726887	0.000899858	0.0010638	0.000744608	0.000569469	0.000513332	0.000476094	0.000675563	0.000775512	0.000622355	0.000794919	0.000566221	0.000709356	0.000786651	0.00117387	0.000914363	0.000825923	0.000628512	0.000866948	0.00315129	0	0.00164245	0.00144386	0.00188628	0.00135516	0.00114427	0.00118349	0.000524867	-0.00485776	-0.00909538	Chengdu	0.154428	-0.00909538	-0.00485776	-0.00423763	0.289141	-0.134714
			-0.594292	Guiyang	0.000625541	0.000592409	0.000702144	0.00064563	0.000512338	0.000483338	0.000442286	0.000414362	0.000773623	0.000773247	0.000857586	0.000765053	0.000864118	0.00124862	0.00063126	0.000858513	0.00120871	0.00166135	0.00101811	0.00183613	0.00343034	0.00164245	0	0.00248552	0.000877971	0.000742519	0.000674416	0.000687851	0.000397758	0.0186944	0.0508718	Guiyang	-0.594292	0.0508718	0.0186944	0.0321774	-1.61721	1.02292
			-0.350345	Kunming	0.000499764	0.000478388	0.000547483	0.000612514	0.000491262	0.000404649	0.000375473	0.000355154	0.000588458	0.000589769	0.000635808	0.000512669	0.000641199	0.000831109	0.000509217	0.000638107	0.000813236	0.000995767	0.00072226	0.00105602	0.00144124	0.00144386	0.00248552	0	0.000817842	0.000699053	0.000638364	0.000650389	0.000384937	0.0110206	-0.0157628	Kunming	-0.350345	-0.0157628	0.0110206	-0.0267834	0.501098	-0.851443
			0.0882028	Xi'an	0.00137036	0.00122079	0.00172075	0.00243971	0.00123025	0.000833289	0.00071834	0.000647472	0.00105252	0.00131696	0.000971406	0.00137392	0.000664818	0.00112482	0.0013494	0.00310812	0.00151695	0.00113043	0.000752368	0.000666491	0.00117998	0.00188628	0.000877971	0.000817842	0	0.00234948	0.00178055	0.00187736	0.000618477	-0.00277455	-0.0669649	Xi'an	0.0882028	-0.0669649	-0.00277455	-0.0641904	2.12881	-2.04061
			-0.59964	Lanzhou	0.000877001	0.000815323	0.000993276	0.00119687	0.00138833	0.000622355	0.000555915	0.000512504	0.000726887	0.000843916	0.000687256	0.000866948	0.000518189	0.000760656	0.000857123	0.00133804	0.000921793	0.000763214	0.000569878	0.000519205	0.000947643	0.00135516	0.000742519	0.000699053	0.00234948	0	0.007353	0.00339369	0.000839455	0.0188626	-0.260494	Lanzhou	-0.59964	-0.260494	0.0188626	-0.279357	8.28109	-8.88073
			-0.960806	Xining	0.000759201	0.000710626	0.000875068	0.00102933	0.00116783	0.00055944	0.000505168	0.000469063	0.000661495	0.00075703	0.000628512	0.000775512	0.000484075	0.000689344	0.000767641	0.00113204	0.000819107	0.000691445	0.000528887	0.000484962	0.000839455	0.00114427	0.000674416	0.000638364	0.00178055	0.007353	0	0.002322	0.000753439	0.0302236	-0.15569	Xining	-0.960806	-0.15569	0.0302236	-0.185913	4.94936	-5.91016
			-1.06459	Yinchuan	0.00118261	0.00107314	0.00102666	0.00120688	0.00234948	0.000762116	0.000664818	0.000603667	0.000674416	0.000774	0.000640165	0.000793331	0.000490958	0.000703388	0.000863179	0.00117041	0.000839012	0.000705575	0.000537115	0.00049187	0.000860373	0.00118349	0.000687851	0.000650389	0.00187736	0.00339369	0.002322	0	0.000790961	0.0334882	-0.0789177	Yinchuan	-1.06459	-0.0789177	0.0334882	-0.112406	2.50879	-3.57337
			-0.632576	Urumchi	0.00042151	0.000406098	0.000454955	0.000493398	0.000523139	0.000351772	0.000329512	0.000313759	0.000389563	0.00042084	0.000390713	0.00042649	0.000320405	0.000361706	0.000424099	0.000515833	0.00043935	0.000399761	0.000339442	0.000320794	0.000449929	0.000524867	0.000397758	0.000384937	0.000618477	0.000839455	0.000753439	0.000790961	0	0.0198987	-0.0232133	Urumchi	-0.632576	-0.0232133	0.0198987	-0.043112	0.737949	-1.37052
																																	1
																																							0

## Sheet: Moran-Exp
City	Population size in 2000	z		Distance	Beijing	Tianjin	Shijiazhuang	Taiyuan	Hohehot	Shenyang	Changchun	Harbin	Shanghai	Nanjing	Hangzhou	Hefei	Fuzhou	Nanchang	Jinan	Zhengzhou	Wuchang	Changsha	Guangzhou	Nanning	Chongqing	Chengdu	Guiyang	Kunming	Xi'an	Lanzhou	Xining	Yinchuan	Urumchi
Beijing	9496688	2.28758		Beijing	0	137	277	508	667	741	1046	1288	1463	1160	1589	1074	2334	1449	497	689	1225	1587	2294	2566	2087	2042	2539	3178	1159	1811	2092	1343	3768
Tianjin	5313702	0.715303		Tianjin	137	0	419	650	804	728	1033	1275	1326	1023	1452	973	2197	1444	360	831	1367	1729	2436	2708	2230	2185	2681	3320	1301	1948	2235	1480	3911
Shijiazhuang	1930579	-0.556324		Shijiazhuang	277	419	0	231	871	1126	1431	1673	1267	964	1393	914	1915	1293	301	412	948	1310	2017	2289	1810	1765	2262	2901	923	1599	1815	1547	3491
Taiyuan	2538336	-0.327884		Taiyuan	508	650	231	0	640	1255	1560	1802	1498	1195	1624	1145	2521	1544	532	577	1179	1537	2243	2515	1997	1493	2460	2593	651	1327	1543	1316	3219
Hohehot	990954	-0.909504		Hohehot	667	804	871	640	0	1408	1713	1955	2130	1827	2256	1777	3303	2674	1164	1362	1898	2256	2962	3234	2637	2133	3100	3233	1291	1144	1360	676	3036
Shenyang	4344933	0.351168		Shenyang	741	728	1126	1255	1408	0	305	547	2054	1751	2180	1701	2925	2151	1088	1538	1972	2334	3041	3313	2834	2789	3286	3925	1906	2552	2839	2084	4515
Changchun	2696430	-0.268461		Changchun	1046	1033	1431	1560	1713	305	0	242	2359	2056	2485	2006	3230	2456	1393	1843	2277	2639	3346	3618	3139	3094	3591	4230	2211	2857	3144	2389	4820
Harbin	3455065	0.0166902		Harbin	1288	1275	1673	1802	1955	547	242	0	2601	2298	2727	2248	3472	2698	1635	2085	2519	2881	3588	3860	3381	3336	3833	4472	2453	3099	3386	2631	5062
Shanghai	12720701	3.4994		Shanghai	1463	1326	1267	1498	2130	2054	2359	2601	0	303	201	615	1180	844	966	998	1235	1207	1810	2082	2516	2351	2053	2699	1509	2185	2401	2355	4077
Nanjing	3447184	0.0137279		Nanjing	1160	1023	964	1195	1827	1751	2056	2298	303	0	429	312	1174	838	663	695	1231	1201	1804	2076	2093	2048	2054	2693	1206	1882	2098	2052	3774
Hangzhou	2451319	-0.360591		Hangzhou	1589	1452	1393	1624	2256	2180	2485	2727	201	429	0	451	979	643	1092	1124	1202	1006	1609	1881	2315	2552	1852	2498	1635	2311	2527	2481	4065
Hefei	1462828	-0.732139		Hefei	1074	973	914	1145	1777	1701	2006	2248	615	312	451	0	1196	478	613	645	1181	1226	1829	2210	2043	1998	2076	3098	1156	1832	2048	2002	3724
Fuzhou	1981083	-0.537341		Fuzhou	2334	2197	1915	2521	3303	2925	3230	3472	1180	1174	979	1196	0	622	1837	1649	1013	985	1588	1860	2301	2805	1838	2477	2389	3065	3281	3235	4957
Nanchang	1669679	-0.654389		Nanchang	1449	1444	1293	1544	2674	2151	2456	2698	844	838	643	478	622	0	1137	927	391	419	1022	1294	1735	2239	1272	1911	1412	2088	2304	2258	4391
Jinan	2585986	-0.309974		Jinan	497	360	301	532	1164	1088	1393	1635	966	663	1092	613	1837	1137	0	666	1202	1564	2156	2428	2064	2019	2516	3119	1177	1853	2069	1840	3745
Zhengzhou	2490838	-0.345737		Zhengzhou	689	831	412	577	1362	1538	1843	2085	998	695	1124	645	1649	927	666	0	536	898	1605	1877	1398	1353	1850	2489	511	1187	1403	1357	3079
Wuchang	6559426	1.18354		Wuchang	1225	1367	948	1179	1898	1972	2277	2519	1235	1231	1202	1181	1013	391	1202	536	0	362	1069	1341	1233	1737	1314	1953	1047	1723	1939	1893	3615
Changsha	2122873	-0.484046		Changsha	1587	1729	1310	1537	2256	2334	2639	2881	1207	1201	1006	1226	985	419	1564	898	362	0	707	979	1419	1923	956	1595	1405	2081	2297	2251	3973
Guangzhou	6868736	1.2998		Guangzhou	2294	2436	2017	2243	2962	3041	3346	3588	1810	1804	1609	1829	1588	1022	2156	1605	1069	707	0	1314	2023	2527	1560	2199	2111	2787	3003	2957	4679
Nanning	1354576	-0.772828		Nanning	2566	2708	2289	2515	3234	3313	3618	3860	2082	2076	1881	2210	1860	1294	2428	1877	1341	979	1314	0	1328	1832	865	1504	2383	3059	3275	3229	4951
Chongqing	5676406	0.851634		Chongqing	2087	2230	1810	1997	2637	2834	3139	3381	2516	2093	2315	2043	2301	1735	2064	1398	1233	1419	2023	1328	0	504	463	1102	1346	1676	1892	1846	3530
Chengdu	3821511	0.154428		Chengdu	2042	2185	1765	1493	2133	2789	3094	3336	2351	2048	2552	1998	2805	2239	2019	1353	1737	1923	2527	1832	504	0	967	1100	842	1172	1388	1342	3026
Guiyang	1829565	-0.594292		Guiyang	2539	2681	2262	2460	3100	3286	3591	3833	2053	2054	1852	2076	1838	1272	2516	1850	1314	956	1560	865	463	967	0	639	1809	2139	2355	2309	3993
Kunming	2478580	-0.350345		Kunming	3178	3320	2901	2593	3233	3925	4230	4472	2699	2693	2498	3098	2477	1911	3119	2489	1953	1595	2199	1504	1102	1100	639	0	1942	2272	2488	2442	4126
Xi'an	3645322	0.0882028		Xi'an	1159	1301	923	651	1291	1906	2211	2453	1509	1206	1635	1156	2389	1412	1177	511	1047	1405	2111	2383	1346	842	1809	1942	0	676	892	846	2568
Lanzhou	1815338	-0.59964		Lanzhou	1811	1948	1599	1327	1144	2552	2857	3099	2185	1882	2311	1832	3065	2088	1853	1187	1723	2081	2787	3059	1676	1172	2139	2272	676	0	216	468	1892
Xining	854466	-0.960806		Xining	2092	2235	1815	1543	1360	2839	3144	3386	2401	2098	2527	2048	3281	2304	2069	1403	1939	2297	3003	3275	1892	1388	2355	2488	892	216	0	684	2108
Yinchuan	578362	-1.06459		Yinchuan	1343	1480	1547	1316	676	2084	2389	2631	2355	2052	2481	2002	3235	2258	1840	1357	1893	2251	2957	3229	1846	1342	2309	2442	846	468	684	0	2008
Urumchi	1727712	-0.632576		Urumchi	3768	3911	3491	3219	3036	4515	4820	5062	4077	3774	4065	3724	4957	4391	3745	3079	3615	3973	4679	4951	3530	3026	3993	4126	2568	1892	2108	2008	0
average	3.41066e+06	1.18679e-16																															1841.99
stdevp	2.66047e+06	1		V	Beijing	Tianjin	Shijiazhuang	Taiyuan	Hohehot	Shenyang	Changchun	Harbin	Shanghai	Nanjing	Hangzhou	Hefei	Fuzhou	Nanchang	Jinan	Zhengzhou	Wuchang	Changsha	Guangzhou	Nanning	Chongqing	Chengdu	Guiyang	Kunming	Xi'an	Lanzhou	Xining	Yinchuan	Urumchi
				Beijing	0	0.928322	0.86038	0.758973	0.696207	0.668792	0.566734	0.496961	0.45192	0.532723	0.42204	0.558185	0.281645	0.455368	0.763519	0.687941	0.514252	0.422499	0.287828	0.248314	0.322061	0.330026	0.251981	0.178118	0.533012	0.374121	0.321188	0.482341	0.129301
Moran's I	-0.0410433			Tianjin	0.928322	0	0.796545	0.702662	0.646304	0.673528	0.570748	0.50048	0.486813	0.573855	0.454627	0.589646	0.303391	0.456605	0.822472	0.6369	0.476097	0.391152	0.266473	0.229891	0.298004	0.305374	0.233285	0.164903	0.493466	0.347305	0.297196	0.447768	0.119642
				Shijiazhuang	0.86038	0.796545	0	0.882137	0.623218	0.542647	0.459839	0.403226	0.502659	0.592534	0.469424	0.608838	0.353583	0.495613	0.849243	0.799578	0.597703	0.49106	0.334535	0.28861	0.374324	0.383581	0.292872	0.207022	0.605871	0.419755	0.373309	0.431774	0.150283
				Taiyuan	0.758973	0.702662	0.882137	0	0.706487	0.505944	0.428737	0.375953	0.443414	0.522696	0.414097	0.537079	0.254455	0.432478	0.749148	0.731068	0.527256	0.434124	0.295908	0.255286	0.338188	0.444619	0.263023	0.244701	0.70228	0.486549	0.432712	0.489463	0.174197
				Hohehot	0.696207	0.646304	0.623218	0.706487	0	0.465617	0.394564	0.345987	0.31463	0.370885	0.293827	0.38109	0.166432	0.234174	0.531567	0.477391	0.356861	0.293827	0.200279	0.172784	0.238925	0.314118	0.185822	0.172878	0.496152	0.53737	0.47791	0.692813	0.192392
				Shenyang	0.668792	0.673528	0.542647	0.505944	0.465617	0	0.8474	0.743072	0.327883	0.386508	0.306204	0.397143	0.204342	0.311063	0.553958	0.433889	0.342809	0.281645	0.191871	0.16553	0.214691	0.220001	0.167975	0.118736	0.355315	0.250209	0.214109	0.322586	0.0861939
				Changchun	0.566734	0.570748	0.459839	0.428737	0.394564	0.8474	0	0.876885	0.277848	0.327527	0.259477	0.336539	0.17316	0.263595	0.469424	0.367677	0.290496	0.238666	0.162591	0.140271	0.181929	0.186429	0.142342	0.100617	0.301094	0.212027	0.181436	0.273359	0.0730407
				Harbin	0.496961	0.50048	0.403226	0.375953	0.345987	0.743072	0.876885	0	0.243641	0.287203	0.227532	0.295106	0.151841	0.231142	0.411631	0.322411	0.254732	0.209282	0.142574	0.123001	0.159531	0.163476	0.124817	0.0882297	0.264025	0.185923	0.159099	0.239705	0.0640483
				Shanghai	0.45192	0.486813	0.502659	0.443414	0.31463	0.327883	0.277848	0.243641	0	0.848321	0.896622	0.716141	0.52697	0.632421	0.591891	0.581697	0.511468	0.519302	0.374324	0.322936	0.255147	0.279057	0.328061	0.231017	0.440774	0.305374	0.271584	0.278452	0.109332
				Nanjing	0.532723	0.573855	0.592534	0.522696	0.370885	0.386508	0.327527	0.287203	0.848321	0	0.792232	0.844186	0.528689	0.634484	0.69772	0.685704	0.512579	0.520996	0.375545	0.32399	0.321013	0.328952	0.327883	0.231771	0.519584	0.359974	0.320143	0.328239	0.12888
				Hangzhou	0.42204	0.454627	0.469424	0.414097	0.293827	0.306204	0.259477	0.227532	0.896622	0.792232	0	0.782827	0.587728	0.705337	0.552756	0.543237	0.520713	0.579176	0.417482	0.36017	0.284565	0.250209	0.365885	0.257653	0.411631	0.285183	0.253628	0.260041	0.110046
				Hefei	0.558185	0.589646	0.608838	0.537079	0.38109	0.397143	0.336539	0.295106	0.716141	0.844186	0.782827	0	0.522412	0.771435	0.716919	0.704572	0.526684	0.513973	0.370483	0.301257	0.329847	0.338004	0.32399	0.186024	0.533881	0.36988	0.328952	0.337271	0.132426
				Fuzhou	0.281645	0.303391	0.353583	0.254455	0.166432	0.204342	0.17316	0.151841	0.52697	0.528689	0.587728	0.522412	0	0.713425	0.368877	0.408514	0.576979	0.585817	0.422269	0.3643	0.286736	0.218098	0.368677	0.260607	0.273359	0.189387	0.168431	0.17269	0.0678054
				Nanchang	0.455368	0.456605	0.495613	0.432478	0.234174	0.311063	0.263595	0.231142	0.632421	0.634484	0.705337	0.771435	0.713425	0	0.539416	0.604556	0.808746	0.796545	0.574167	0.495344	0.38988	0.296551	0.501296	0.354351	0.464607	0.321886	0.286269	0.293508	0.0921961
				Jinan	0.763519	0.822472	0.849243	0.749148	0.531567	0.553958	0.469424	0.411631	0.591891	0.69772	0.552756	0.716919	0.368877	0.539416	0	0.696585	0.520713	0.427807	0.31022	0.267632	0.326107	0.334172	0.255147	0.183915	0.527829	0.365687	0.325223	0.368277	0.130925
				Zhengzhou	0.687941	0.6369	0.799578	0.731068	0.477391	0.433889	0.367677	0.322411	0.581697	0.685704	0.543237	0.704572	0.408514	0.604556	0.696585	0	0.747523	0.61415	0.41839	0.360953	0.468152	0.47973	0.366283	0.258915	0.757738	0.524971	0.466883	0.478689	0.187953
				Wuchang	0.514252	0.476097	0.597703	0.527256	0.356861	0.342809	0.290496	0.254732	0.511468	0.512579	0.520713	0.526684	0.576979	0.808746	0.520713	0.747523	0	0.821579	0.559702	0.482865	0.512023	0.389457	0.489995	0.346363	0.566427	0.392428	0.349006	0.357831	0.140499
				Changsha	0.422499	0.391152	0.49106	0.434124	0.293827	0.281645	0.238666	0.209282	0.519302	0.520996	0.579176	0.513973	0.585817	0.796545	0.427807	0.61415	0.821579	0	0.681251	0.587728	0.462845	0.35205	0.595113	0.420668	0.466376	0.323112	0.287359	0.294626	0.115682
				Guangzhou	0.287828	0.266473	0.334535	0.295908	0.200279	0.191871	0.162591	0.142574	0.374324	0.375545	0.417482	0.370483	0.422269	0.574167	0.31022	0.41839	0.559702	0.681251	0	0.489995	0.333447	0.253628	0.428737	0.303062	0.317892	0.22024	0.19587	0.200823	0.0788514
				Nanning	0.248314	0.229891	0.28861	0.255286	0.172784	0.16553	0.140271	0.123001	0.322936	0.32399	0.36017	0.301257	0.3643	0.495344	0.267632	0.360953	0.482865	0.587728	0.489995	0	0.486285	0.36988	0.625252	0.441972	0.274251	0.190005	0.168981	0.173254	0.0680266
				Chongqing	0.322061	0.298004	0.374324	0.338188	0.238925	0.214691	0.181929	0.159531	0.255147	0.321013	0.284565	0.329847	0.286736	0.38988	0.326107	0.468152	0.512023	0.462845	0.333447	0.486285	0	0.760623	0.777743	0.549764	0.481556	0.40257	0.358026	0.367079	0.147135
				Chengdu	0.330026	0.305374	0.383581	0.444619	0.314118	0.220001	0.186429	0.163476	0.279057	0.328952	0.250209	0.338004	0.218098	0.296551	0.334172	0.47973	0.389457	0.35205	0.253628	0.36988	0.760623	0	0.591569	0.550361	0.633108	0.529263	0.4707	0.482603	0.19344
				Guiyang	0.251981	0.233285	0.292872	0.263023	0.185822	0.167975	0.142342	0.124817	0.328061	0.327883	0.365885	0.32399	0.368677	0.501296	0.255147	0.366283	0.489995	0.595113	0.428737	0.625252	0.777743	0.591569	0	0.706871	0.374527	0.313096	0.278452	0.285493	0.114433
				Kunming	0.178118	0.164903	0.207022	0.244701	0.172878	0.118736	0.100617	0.0882297	0.231017	0.231771	0.257653	0.186024	0.260607	0.354351	0.183915	0.258915	0.346363	0.420668	0.303062	0.441972	0.549764	0.550361	0.706871	0	0.348438	0.291286	0.259055	0.265606	0.106462
				Xi'an	0.533012	0.493466	0.605871	0.70228	0.496152	0.355315	0.301094	0.264025	0.440774	0.519584	0.411631	0.533881	0.273359	0.464607	0.527829	0.757738	0.566427	0.466376	0.317892	0.274251	0.481556	0.633108	0.374527	0.348438	0	0.692813	0.616153	0.631734	0.248045
				Lanzhou	0.374121	0.347305	0.419755	0.486549	0.53737	0.250209	0.212027	0.185923	0.305374	0.359974	0.285183	0.36988	0.189387	0.321886	0.365687	0.524971	0.392428	0.323112	0.22024	0.190005	0.40257	0.529263	0.313096	0.291286	0.692813	0	0.88935	0.775635	0.358026
				Xining	0.321188	0.297196	0.373309	0.432712	0.47791	0.214109	0.181436	0.159099	0.271584	0.320143	0.253628	0.328952	0.168431	0.286269	0.325223	0.466883	0.349006	0.287359	0.19587	0.168981	0.358026	0.4707	0.278452	0.259055	0.616153	0.88935	0	0.689811	0.31841
				Yinchuan	0.482341	0.447768	0.431774	0.489463	0.692813	0.322586	0.273359	0.239705	0.278452	0.328239	0.260041	0.337271	0.17269	0.293508	0.368277	0.478689	0.357831	0.294626	0.200823	0.173254	0.367079	0.482603	0.285493	0.265606	0.631734	0.775635	0.689811	0	0.336174
				Urumchi	0.129301	0.119642	0.150283	0.174197	0.192392	0.0861939	0.0730407	0.0640483	0.109332	0.12888	0.110046	0.132426	0.0678054	0.0921961	0.130925	0.187953	0.140499	0.115682	0.0788514	0.0680266	0.147135	0.19344	0.114433	0.106462	0.248045	0.358026	0.31841	0.336174	0
																																	326.712
			z	W	Beijing	Tianjin	Shijiazhuang	Taiyuan	Hohehot	Shenyang	Changchun	Harbin	Shanghai	Nanjing	Hangzhou	Hefei	Fuzhou	Nanchang	Jinan	Zhengzhou	Wuchang	Changsha	Guangzhou	Nanning	Chongqing	Chengdu	Guiyang	Kunming	Xi'an	Lanzhou	Xining	Yinchuan	Urumchi	f*	f	City	z	f	f*	ef	z*	ez
			2.28758	Beijing	0	0.00284141	0.00263345	0.00232306	0.00213095	0.00204703	0.00173466	0.00152109	0.00138323	0.00163056	0.00129178	0.00170849	0.000862057	0.00139379	0.00233698	0.00210565	0.00157402	0.00129318	0.000880982	0.000760039	0.000985762	0.00101014	0.000771262	0.000545182	0.00163144	0.00114511	0.00098309	0.00147635	0.000395763	-0.0938897	-0.078412	Beijing	2.28758	-0.078412	-0.0938897	0.0154776	1.91047	0.377106
			0.715303	Tianjin	0.00284141	0	0.00243806	0.0021507	0.00197821	0.00206153	0.00174694	0.00153187	0.00149004	0.00175645	0.00139152	0.00180478	0.000928618	0.00139758	0.00251742	0.00194942	0.00145724	0.00119724	0.000815618	0.000703649	0.000912129	0.000934687	0.000714039	0.000504733	0.0015104	0.00106303	0.000909657	0.00137053	0.0003662	-0.0293584	0.0690103	Tianjin	0.715303	0.0690103	-0.0293584	0.0983686	-1.6814	2.39671
			-0.556324	Shijiazhuang	0.00263345	0.00243806	0	0.00270004	0.00190754	0.00166093	0.00140747	0.00123419	0.00153854	0.00181362	0.00143681	0.00186353	0.00108224	0.00151697	0.00259936	0.00244734	0.00182945	0.00150304	0.00102394	0.000883376	0.00114573	0.00117406	0.00089642	0.000633653	0.00185445	0.00128478	0.00114262	0.00132157	0.000459986	0.0228334	0.138037	Shijiazhuang	-0.556324	0.138037	0.0228334	0.115203	-3.3632	2.80687
			-0.327884	Taiyuan	0.00232306	0.0021507	0.00270004	0	0.00216241	0.00154859	0.00131228	0.00115072	0.0013572	0.00159987	0.00126746	0.00164389	0.000778836	0.00132373	0.00229299	0.00223765	0.00161382	0.00132877	0.000905714	0.000781377	0.00103512	0.00136089	0.00080506	0.00074898	0.00214954	0.00148923	0.00132444	0.00149815	0.000533181	0.0134574	0.0643526	Taiyuan	-0.327884	0.0643526	0.0134574	0.0508952	-1.56792	1.24004
			-0.909504	Hohehot	0.00213095	0.00197821	0.00190754	0.00216241	0	0.00142516	0.00120768	0.001059	0.000963017	0.0011352	0.000899345	0.00116644	0.000509413	0.000716758	0.00162702	0.0014612	0.00109228	0.000899345	0.000613012	0.000528857	0.000731301	0.00096145	0.000568764	0.000529144	0.00151862	0.00164478	0.00146279	0.00212056	0.000588873	0.037329	0.0514453	Hohehot	-0.909504	0.0514453	0.037329	0.0141162	-1.25344	0.343935
			0.351168	Shenyang	0.00204703	0.00206153	0.00166093	0.00154859	0.00142516	0	0.00259372	0.00227439	0.00100358	0.00118302	0.000937228	0.00121557	0.00062545	0.0009521	0.00169555	0.00132804	0.00104927	0.000862057	0.000587277	0.000506655	0.000657126	0.000673377	0.000514136	0.000363428	0.00108755	0.000765838	0.000655344	0.000987369	0.000263822	-0.0144131	0.0679633	Shenyang	0.351168	0.0679633	-0.0144131	0.0823764	-1.65589	2.00706
			-0.268461	Changchun	0.00173466	0.00174694	0.00140747	0.00131228	0.00120768	0.00259372	0	0.00268396	0.000850436	0.00100249	0.000794207	0.00103008	0.000530007	0.00080681	0.00143681	0.00112539	0.00088915	0.000730507	0.000497659	0.00042934	0.000556848	0.00057062	0.000435679	0.000307969	0.000921586	0.000648971	0.000555339	0.000836697	0.000223563	0.0110185	0.101484	Changchun	-0.268461	0.101484	0.0110185	0.0904655	-2.47261	2.20415
			0.0166902	Harbin	0.00152109	0.00153187	0.00123419	0.00115072	0.001059	0.00227439	0.00268396	0	0.000745734	0.00087907	0.000696428	0.000903259	0.000464755	0.000707479	0.00125992	0.000986833	0.000779682	0.000640571	0.000436389	0.000376481	0.000488292	0.000500368	0.00038204	0.000270053	0.000808125	0.000569073	0.000486968	0.000733687	0.000196039	-0.00068502	0.066955	Harbin	0.0166902	0.066955	-0.00068502	0.0676401	-1.63133	1.64802
			3.4994	Shanghai	0.00138323	0.00149004	0.00153854	0.0013572	0.000963017	0.00100358	0.000850436	0.000745734	0	0.00259654	0.00274438	0.00219196	0.00161295	0.00193571	0.00181166	0.00178046	0.0015655	0.00158948	0.00114573	0.000988442	0.000780953	0.000854137	0.00100413	0.000707095	0.00134912	0.000934687	0.000831264	0.000852284	0.000334642	-0.143627	-0.124044	Shanghai	3.4994	-0.124044	-0.143627	0.0195831	3.02226	0.477134
			0.0137279	Nanjing	0.00163056	0.00175645	0.00181362	0.00159987	0.0011352	0.00118302	0.00100249	0.00087907	0.00259654	0	0.00242486	0.00258388	0.00161821	0.00194203	0.00213558	0.0020988	0.0015689	0.00159466	0.00114947	0.000991667	0.000982557	0.00100686	0.00100358	0.000709402	0.00159034	0.00110181	0.000979893	0.00100467	0.000394475	-0.000563439	0.132024	Nanjing	0.0137279	0.132024	-0.000563439	0.132587	-3.2167	3.23043
			-0.360591	Hangzhou	0.00129178	0.00139152	0.00143681	0.00126746	0.000899345	0.000937228	0.000794207	0.000696428	0.00274438	0.00242486	0	0.00239607	0.00179892	0.00215889	0.00169187	0.00166274	0.0015938	0.00177274	0.00127783	0.00110241	0.000870995	0.000765838	0.0011199	0.000788622	0.00125992	0.000872888	0.000776303	0.000795934	0.000336829	0.0147999	0.17359	Hangzhou	-0.360591	0.17359	0.0147999	0.15879	-4.22944	3.86885
			-0.732139	Hefei	0.00170849	0.00180478	0.00186353	0.00164389	0.00116644	0.00121557	0.00103008	0.000903259	0.00219196	0.00258388	0.00239607	0	0.001599	0.00236121	0.00219434	0.00215655	0.00161207	0.00157317	0.00113397	0.000922087	0.00100959	0.00103456	0.000991667	0.000569382	0.0016341	0.00113213	0.00100686	0.00103232	0.00040533	0.0300494	0.145607	Hefei	-0.732139	0.145607	0.0300494	0.115558	-3.54765	2.81552
			-0.537341	Fuzhou	0.000862057	0.000928618	0.00108224	0.000778836	0.000509413	0.00062545	0.000530007	0.000464755	0.00161295	0.00161821	0.00179892	0.001599	0	0.00218365	0.00112906	0.00125038	0.00176601	0.00179307	0.00129248	0.00111505	0.00087764	0.000667553	0.00112844	0.000797664	0.000836697	0.000579675	0.000515534	0.00052857	0.000207538	0.0220542	0.101916	Fuzhou	-0.537341	0.101916	0.0220542	0.0798614	-2.48313	1.94579
			-0.654389	Nanchang	0.00139379	0.00139758	0.00151697	0.00132373	0.000716758	0.0009521	0.00080681	0.000707479	0.00193571	0.00194203	0.00215889	0.00236121	0.00218365	0	0.00165104	0.00185042	0.00247541	0.00243806	0.00175741	0.00151615	0.00119334	0.000907683	0.00153437	0.0010846	0.00142207	0.000985227	0.000876212	0.000898369	0.000282193	0.0268583	0.134584	Nanchang	-0.654389	0.134584	0.0268583	0.107725	-3.27907	2.62468
			-0.309974	Jinan	0.00233698	0.00251742	0.00259936	0.00229299	0.00162702	0.00169555	0.00143681	0.00125992	0.00181166	0.00213558	0.00169187	0.00219434	0.00112906	0.00165104	0	0.0021321	0.0015938	0.00130943	0.000949519	0.000819168	0.000998148	0.00102283	0.000780953	0.000562928	0.00161558	0.00111929	0.000995442	0.00112722	0.000400735	0.0127223	0.135997	Jinan	-0.309974	0.135997	0.0127223	0.123274	-3.31349	3.00352
			-0.345737	Zhengzhou	0.00210565	0.00194942	0.00244734	0.00223765	0.0014612	0.00132804	0.00112539	0.000986833	0.00178046	0.0020988	0.00166274	0.00215655	0.00125038	0.00185042	0.0021321	0	0.00228802	0.00187979	0.00128061	0.0011048	0.00143292	0.00146835	0.00112112	0.000792484	0.00231928	0.00160683	0.00142903	0.00146517	0.000575286	0.0141902	0.103276	Zhengzhou	-0.345737	0.103276	0.0141902	0.0890854	-2.51626	2.17052
			1.18354	Wuchang	0.00157402	0.00145724	0.00182945	0.00161382	0.00109228	0.00104927	0.00088915	0.000779682	0.0015655	0.0015689	0.0015938	0.00161207	0.00176601	0.00247541	0.0015938	0.00228802	0	0.00251469	0.00171313	0.00147795	0.0015672	0.00119205	0.00149978	0.00106015	0.00173372	0.00120114	0.00106824	0.00109525	0.000430039	-0.0485763	-0.0223861	Wuchang	1.18354	-0.0223861	-0.0485763	0.0261902	0.545427	0.638111
			-0.484046	Changsha	0.00129318	0.00119724	0.00150304	0.00132877	0.000899345	0.000862057	0.000730507	0.000640571	0.00158948	0.00159466	0.00177274	0.00157317	0.00179307	0.00243806	0.00130943	0.00187979	0.00251469	0	0.00208517	0.00179892	0.00141667	0.00107755	0.00182152	0.00128758	0.00142748	0.000988978	0.000879548	0.000901789	0.00035408	0.0198668	0.106135	Changsha	-0.484046	0.106135	0.0198668	0.0862684	-2.58593	2.10189
			1.2998	Guangzhou	0.000880982	0.000815618	0.00102394	0.000905714	0.000613012	0.000587277	0.000497659	0.000436389	0.00114573	0.00114947	0.00127783	0.00113397	0.00129248	0.00175741	0.000949519	0.00128061	0.00171313	0.00208517	0	0.00149978	0.00102061	0.000776303	0.00131228	0.00092761	0.000973002	0.000674108	0.000599518	0.000614679	0.000241348	-0.053348	-0.0159809	Guangzhou	1.2998	-0.0159809	-0.053348	0.0373671	0.389367	0.910432
			-0.772828	Nanning	0.000760039	0.000703649	0.000883376	0.000781377	0.000528857	0.000506655	0.00042934	0.000376481	0.000988442	0.000991667	0.00110241	0.000922087	0.00111505	0.00151615	0.000819168	0.0011048	0.00147795	0.00179892	0.00149978	0	0.00148842	0.00113213	0.00191377	0.00135279	0.000839427	0.000581566	0.000517216	0.000530295	0.000208215	0.0317194	0.0709377	Nanning	-0.772828	0.0709377	0.0317194	0.0392183	-1.72836	0.955536
			0.851634	Chongqing	0.000985762	0.000912129	0.00114573	0.00103512	0.000731301	0.000657126	0.000556848	0.000488292	0.000780953	0.000982557	0.000870995	0.00100959	0.00087764	0.00119334	0.000998148	0.00143292	0.0015672	0.00141667	0.00102061	0.00148842	0	0.00232811	0.00238051	0.00168271	0.00147395	0.00123218	0.00109584	0.00112355	0.000450349	-0.0349538	-0.0710882	Chongqing	0.851634	-0.0710882	-0.0349538	-0.0361343	1.73203	-0.880396
			0.154428	Chengdu	0.00101014	0.000934687	0.00117406	0.00136089	0.00096145	0.000673377	0.00057062	0.000500368	0.000854137	0.00100686	0.000765838	0.00103456	0.000667553	0.000907683	0.00102283	0.00146835	0.00119205	0.00107755	0.000776303	0.00113213	0.00232811	0	0.00181067	0.00168454	0.00193781	0.00161997	0.00144072	0.00147715	0.000592079	-0.00633821	-0.0435883	Chengdu	0.154428	-0.0435883	-0.00633821	-0.0372501	1.06201	-0.90758
			-0.594292	Guiyang	0.000771262	0.000714039	0.00089642	0.00080506	0.000568764	0.000514136	0.000435679	0.00038204	0.00100413	0.00100358	0.0011199	0.000991667	0.00112844	0.00153437	0.000780953	0.00112112	0.00149978	0.00182152	0.00131228	0.00191377	0.00238051	0.00181067	0	0.00216359	0.00114635	0.000958323	0.000852284	0.000873836	0.000350256	0.0243917	0.0419753	Guiyang	-0.594292	0.0419753	0.0243917	0.0175836	-1.02271	0.428415
			-0.350345	Kunming	0.000545182	0.000504733	0.000633653	0.00074898	0.000529144	0.000363428	0.000307969	0.000270053	0.000707095	0.000709402	0.000788622	0.000569382	0.000797664	0.0010846	0.000562928	0.000792484	0.00106015	0.00128758	0.00092761	0.00135279	0.00168271	0.00168454	0.00216359	0	0.0010665	0.000891567	0.000792915	0.000812965	0.000325857	0.0143793	-0.00871569	Kunming	-0.350345	-0.00871569	0.0143793	-0.023095	0.212354	-0.562698
			0.0882028	Xi'an	0.00163144	0.0015104	0.00185445	0.00214954	0.00151862	0.00108755	0.000921586	0.000808125	0.00134912	0.00159034	0.00125992	0.0016341	0.000836697	0.00142207	0.00161558	0.00231928	0.00173372	0.00142748	0.000973002	0.000839427	0.00147395	0.00193781	0.00114635	0.0010665	0	0.00212056	0.00188592	0.00193361	0.000759214	-0.00362013	-0.0259153	Xi'an	0.0882028	-0.0259153	-0.00362013	-0.0222952	0.631415	-0.543212
			-0.59964	Lanzhou	0.00114511	0.00106303	0.00128478	0.00148923	0.00164478	0.000765838	0.000648971	0.000569073	0.000934687	0.00110181	0.000872888	0.00113213	0.000579675	0.000985227	0.00111929	0.00160683	0.00120114	0.000988978	0.000674108	0.000581566	0.00123218	0.00161997	0.000958323	0.000891567	0.00212056	0	0.00272212	0.00237406	0.00109584	0.0246112	-0.0809944	Lanzhou	-0.59964	-0.0809944	0.0246112	-0.105606	1.97339	-2.57303
			-0.960806	Xining	0.00098309	0.000909657	0.00114262	0.00132444	0.00146279	0.000655344	0.000555339	0.000486968	0.000831264	0.000979893	0.000776303	0.00100686	0.000515534	0.000876212	0.000995442	0.00142903	0.00106824	0.000879548	0.000599518	0.000517216	0.00109584	0.00144072	0.000852284	0.000792915	0.00188592	0.00272212	0	0.00211137	0.000974588	0.0394346	-0.0550996	Xining	-0.960806	-0.0550996	0.0394346	-0.0945342	1.34248	-2.30328
			-1.06459	Yinchuan	0.00147635	0.00137053	0.00132157	0.00149815	0.00212056	0.000987369	0.000836697	0.000733687	0.000852284	0.00100467	0.000795934	0.00103232	0.00052857	0.000898369	0.00112722	0.00146517	0.00109525	0.000901789	0.000614679	0.000530295	0.00112355	0.00147715	0.000873836	0.000812965	0.00193361	0.00237406	0.00211137	0	0.00102896	0.0436941	-0.0214706	Yinchuan	-1.06459	-0.0214706	0.0436941	-0.0651647	0.523121	-1.58771
			-0.632576	Urumchi	0.000395763	0.0003662	0.000459986	0.000533181	0.000588873	0.000263822	0.000223563	0.000196039	0.000334642	0.000394475	0.000336829	0.00040533	0.000207538	0.000282193	0.000400735	0.000575286	0.000430039	0.00035408	0.000241348	0.000208215	0.000450349	0.000592079	0.000350256	0.000325857	0.000759214	0.00109584	0.000974588	0.00102896	0	0.025963	-0.0464904	Urumchi	-0.632576	-0.0464904	0.025963	-0.0724534	1.13272	-1.76529
																																	1
																																							0

## Sheet: Geary-Power
					z'	2.24779	0.702862	-0.546648	-0.322181	-0.893686	0.34506	-0.263791	0.0163999	3.43853	0.0134892	-0.35432	-0.719405	-0.527995	-0.643008	-0.304582	-0.339724	1.16295	-0.475627	1.27719	-0.759387	0.836822	0.151742	-0.583956	-0.344251	0.0866687	-0.589211	-0.944096	-1.04607	-0.621574
City	Population size in 2000	z		z	Z	Beijing	Tianjin	Shijiazhuang	Taiyuan	Hohehot	Shenyang	Changchun	Harbin	Shanghai	Nanjing	Hangzhou	Hefei	Fuzhou	Nanchang	Jinan	Zhengzhou	Wuchang	Changsha	Guangzhou	Nanning	Chongqing	Chengdu	Guiyang	Kunming	Xi'an	Lanzhou	Xining	Yinchuan	Urumchi
Beijing	9496688	2.24779		2.24779	Beijing	0	2.3868	7.80888	6.60475	9.86887	3.62038	6.30804	4.9791	1.41787	4.9921	6.77098	8.80425	7.70498	8.35671	6.51461	6.69523	1.17687	7.417	0.94206	9.04311	1.99083	4.39342	8.01879	6.71868	4.67045	8.04857	10.1881	10.8495	8.23325
Tianjin	5313702	0.702862		0.702862	Tianjin	2.3868	0	1.56127	1.05071	2.54896	0.128022	0.934419	0.47123	7.48391	0.475235	1.11763	2.02284	1.51501	1.81137	1.01494	1.08699	0.211684	1.38884	0.329855	2.13817	0.0179452	0.303733	1.6559	1.09645	0.379694	1.66945	2.71247	3.05877	1.75413
Shijiazhuang	1930579	-0.546648		-0.546648	Shijiazhuang	7.80888	1.56127	0	0.0503853	0.120435	0.795144	0.0800078	0.317023	15.8817	0.313754	0.0369901	0.0298451	0.000347933	0.00928521	0.0585957	0.0428175	2.92274	0.005044	3.32639	0.0452578	1.91399	0.487748	0.0013919	0.0409644	0.40109	0.00181158	0.157965	0.249423	0.00561393
Taiyuan	2538336	-0.322181		-0.322181	Taiyuan	6.60475	1.05071	0.0503853	0	0.326617	0.445211	0.00340937	0.114637	14.143	0.112675	0.00103289	0.157787	0.0423593	0.10293	0.00030972	0.000307747	2.20562	0.0235455	2.558	0.191149	1.34329	0.224603	0.068526	0.000487087	0.167158	0.0713047	0.386777	0.524016	0.089636
Hohehot	990954	-0.893686		-0.893686	Hohehot	9.86887	2.54896	0.120435	0.326617	0	1.53449	0.396767	0.828256	18.7681	0.822966	0.290915	0.0303736	0.13373	0.0628393	0.347042	0.306873	4.22976	0.174773	4.71271	0.0180362	2.99465	1.09292	0.0959323	0.301878	0.961094	0.0927049	0.00254116	0.0232212	0.0740446
Shenyang	4344933	0.34506		0.34506	Shenyang	3.62038	0.128022	0.795144	0.445211	1.53449	0	0.370701	0.108018	9.56958	0.109939	0.489133	1.13309	0.762226	0.976279	0.422036	0.46893	0.668948	0.673528	0.86887	1.2198	0.241829	0.0373721	0.863072	0.475151	0.0667663	0.872862	1.66192	1.93525	0.934382
Changchun	2696430	-0.263791		-0.263791	Changchun	6.30804	0.934419	0.0800078	0.00340937	0.396767	0.370701	0	0.0785072	13.7072	0.0768846	0.00819539	0.207584	0.0698035	0.143805	0.0016639	0.00576576	2.0356	0.0448742	2.37463	0.245615	1.21135	0.172668	0.102505	0.00647379	0.122822	0.105898	0.462814	0.611961	0.128008
Harbin	3455065	0.0163999		0.0163999	Harbin	4.9791	0.47123	0.317023	0.114637	0.828256	0.108018	0.0785072	0	11.711	8.4724e-06	0.137433	0.541409	0.296366	0.434819	0.10303	0.126824	1.31458	0.24209	1.5896	0.601845	0.673092	0.0183174	0.360427	0.130069	0.0049377	0.366764	0.922551	1.12884	0.407011
Shanghai	12720701	3.43853		3.43853	Shanghai	1.41787	7.48391	15.8817	14.143	18.7681	9.56958	13.7072	11.711	0	11.7309	14.3857	17.2885	15.7334	16.659	14.0109	14.2752	5.17827	15.3207	4.6714	17.6225	6.76891	10.803	16.1804	14.3095	11.235	16.2227	19.2074	20.1117	16.4845
Nanjing	3447184	0.0134892		0.0134892	Nanjing	4.9921	0.475235	0.313754	0.112675	0.822966	0.109939	0.0768846	8.4724e-06	11.7309	0	0.135283	0.537134	0.293205	0.430988	0.10117	0.12476	1.32127	0.239234	1.59695	0.597337	0.677876	0.0191138	0.356941	0.127978	0.00535524	0.363247	0.916968	1.12267	0.403305
Hangzhou	2451319	-0.35432		-0.35432	Hangzhou	6.77098	1.11763	0.0369901	0.00103289	0.290915	0.489133	0.00819539	0.137433	14.3857	0.135283	0	0.133287	0.0301631	0.0833407	0.00247381	0.000213037	2.30212	0.0147154	2.66183	0.164079	1.41882	0.256098	0.0527328	0.000101374	0.194471	0.0551737	0.347835	0.478519	0.0714248
Hefei	1462828	-0.719405		-0.719405	Hefei	8.80425	2.02284	0.0298451	0.157787	0.0303736	1.13309	0.207584	0.541409	17.2885	0.537134	0.133287	0	0.0366379	0.00583659	0.172078	0.144158	3.54327	0.059428	3.9864	0.00159851	2.42184	0.758897	0.0183465	0.140741	0.649755	0.0169507	0.0504856	0.10671	0.00957095
Fuzhou	1981083	-0.527995		-0.527995	Fuzhou	7.70498	1.51501	0.000347933	0.0423593	0.13373	0.762226	0.0698035	0.296366	15.7334	0.293205	0.0301631	0.0366379	0	0.0132279	0.0499132	0.035446	2.8593	0.00274243	3.2587	0.0535421	1.86272	0.462042	0.00313164	0.0337617	0.377812	0.00374735	0.17314	0.268402	0.00875705
Nanchang	1669679	-0.643008		-0.643008	Nanchang	8.35671	1.81137	0.00928521	0.10293	0.0628393	0.976279	0.143805	0.434819	16.659	0.430988	0.0833407	0.00583659	0.0132279	0	0.114532	0.091981	3.26149	0.0280164	3.68717	0.0135441	2.1899	0.631627	0.0034871	0.0892554	0.532428	0.00289413	0.0906538	0.16246	0.000459403
Jinan	2585986	-0.304582		-0.304582	Jinan	6.51461	1.01494	0.0585957	0.00030972	0.347042	0.422036	0.0016639	0.10303	14.0109	0.10117	0.00247381	0.172078	0.0499132	0.114532	0	0.00123493	2.15366	0.0292562	2.50201	0.206847	1.3028	0.208232	0.0780496	0.00157362	0.153077	0.0810132	0.408977	0.549805	0.100484
Zhengzhou	2490838	-0.339724		-0.339724	Zhengzhou	6.69523	1.08699	0.0428175	0.000307747	0.306873	0.46893	0.00576576	0.126824	14.2752	0.12476	0.000213037	0.144158	0.035446	0.091981	0.00123493	0	2.25804	0.0184696	2.61442	0.176117	1.38426	0.241539	0.0596493	2.04967e-05	0.181811	0.0622436	0.365265	0.498926	0.0794395
Wuchang	6559426	1.16295		1.16295	Wuchang	1.17687	0.211684	2.92274	2.20562	4.22976	0.668948	2.0356	1.31458	5.17827	1.32127	2.30212	3.54327	2.8593	3.26149	2.15366	2.25804	0	2.68494	0.0130506	3.69539	0.106362	1.02255	3.05169	2.27166	1.15839	3.07008	4.43965	4.87979	3.18454
Changsha	2122873	-0.475627		-0.475627	Changsha	7.417	1.38884	0.005044	0.0235455	0.174773	0.673528	0.0448742	0.24209	15.3207	0.239234	0.0147154	0.059428	0.00274243	0.0280164	0.0292562	0.0184696	2.68494	0	3.07237	0.0805197	1.72252	0.393591	0.0117352	0.0172595	0.316176	0.0129013	0.219463	0.325406	0.0213006
Guangzhou	6868736	1.27719		1.27719	Guangzhou	0.94206	0.329855	3.32639	2.558	4.71271	0.86887	2.37463	1.5896	4.6714	1.59695	2.66183	3.9864	3.2587	3.68717	2.50201	2.61442	0.0130506	3.07237	0	4.14765	0.193926	1.26664	3.46387	2.62908	1.41735	3.48346	4.93412	5.39755	3.60531
Nanning	1354576	-0.759387		-0.759387	Nanning	9.04311	2.13817	0.0452578	0.191149	0.0180362	1.2198	0.245615	0.601845	17.6225	0.597337	0.164079	0.00159851	0.0535421	0.0135441	0.206847	0.176117	3.69539	0.0805197	4.14765	0	2.54788	0.830155	0.0307759	0.172337	0.71581	0.0289599	0.0341173	0.0821877	0.0189923
Chongqing	5676406	0.836822		0.836822	Chongqing	1.99083	0.0179452	1.91399	1.34329	2.99465	0.241829	1.21135	0.673092	6.76891	0.677876	1.41882	2.42184	1.86272	2.1899	1.3028	1.38426	0.106362	1.72252	0.193926	2.54788	0	0.469334	2.01861	1.39493	0.562729	2.03357	3.17167	3.54528	2.12692
Chengdu	3821511	0.151742		0.151742	Chengdu	4.39342	0.303733	0.487748	0.224603	1.09292	0.0373721	0.172668	0.0183174	10.803	0.0191138	0.256098	0.758897	0.462042	0.631627	0.208232	0.241539	1.02255	0.393591	1.26664	0.830155	0.469334	0	0.541251	0.246009	0.00423449	0.54901	1.20086	1.43475	0.598017
Guiyang	1829565	-0.583956		-0.583956	Guiyang	8.01879	1.6559	0.0013919	0.068526	0.0959323	0.863072	0.102505	0.360427	16.1804	0.356941	0.0527328	0.0183465	0.00313164	0.0034871	0.0780496	0.0596493	3.05169	0.0117352	3.46387	0.0307759	2.01861	0.541251	0	0.0574584	0.449738	2.76103e-05	0.1297	0.21355	0.00141511
Kunming	2478580	-0.344251		-0.344251	Kunming	6.71868	1.09645	0.0409644	0.000487087	0.301878	0.475151	0.00647379	0.130069	14.3095	0.127978	0.000101374	0.140741	0.0337617	0.0892554	0.00157362	2.04967e-05	2.27166	0.0172595	2.62908	0.172337	1.39493	0.246009	0.0574584	0	0.185692	0.0600051	0.359813	0.49255	0.0769079
Xi'an	3645322	0.0866687		0.0866687	Xi'an	4.67045	0.379694	0.40109	0.167158	0.961094	0.0667663	0.122822	0.0049377	11.235	0.00535524	0.194471	0.649755	0.377812	0.532428	0.153077	0.181811	1.15839	0.316176	1.41735	0.71581	0.562729	0.00423449	0.449738	0.185692	0	0.456813	1.06247	1.2831	0.501608
Lanzhou	1815338	-0.589211		-0.589211	Lanzhou	8.04857	1.66945	0.00181158	0.0713047	0.0927049	0.872862	0.105898	0.366764	16.2227	0.363247	0.0551737	0.0169507	0.00374735	0.00289413	0.0810132	0.0622436	3.07008	0.0129013	3.48346	0.0289599	2.03357	0.54901	2.76103e-05	0.0600051	0.456813	0	0.125943	0.208721	0.00104739
Xining	854466	-0.944096		-0.944096	Xining	10.1881	2.71247	0.157965	0.386777	0.00254116	1.66192	0.462814	0.922551	19.2074	0.916968	0.347835	0.0504856	0.17314	0.0906538	0.408977	0.365265	4.43965	0.219463	4.93412	0.0341173	3.17167	1.20086	0.1297	0.359813	1.06247	0.125943	0	0.0103989	0.10402
Yinchuan	578362	-1.04607		-1.04607	Yinchuan	10.8495	3.05877	0.249423	0.524016	0.0232212	1.93525	0.611961	1.12884	20.1117	1.12267	0.478519	0.10671	0.268402	0.16246	0.549805	0.498926	4.87979	0.325406	5.39755	0.0821877	3.54528	1.43475	0.21355	0.49255	1.2831	0.208721	0.0103989	0	0.180197
Urumchi	1727712	-0.621574		-0.621574	Urumchi	8.23325	1.75413	0.00561393	0.089636	0.0740446	0.934382	0.128008	0.407011	16.4845	0.403305	0.0714248	0.00957095	0.00875705	0.000459403	0.100484	0.0794395	3.18454	0.0213006	3.60531	0.0189923	2.12692	0.598017	0.00141511	0.0769079	0.501608	0.00104739	0.10402	0.180197	0
average	3.41066e+06	1.14851e-16
stdev	2.70756e+06	0.982607			W	Beijing	Tianjin	Shijiazhuang	Taiyuan	Hohehot	Shenyang	Changchun	Harbin	Shanghai	Nanjing	Hangzhou	Hefei	Fuzhou	Nanchang	Jinan	Zhengzhou	Wuchang	Changsha	Guangzhou	Nanning	Chongqing	Chengdu	Guiyang	Kunming	Xi'an	Lanzhou	Xining	Yinchuan	Urumchi
					Beijing	0	0.0115931	0.00573375	0.00312647	0.00238118	0.00214339	0.0015184	0.00123311	0.00108561	0.00136918	0.000999527	0.00147882	0.000680484	0.0010961	0.00319567	0.00230515	0.00129653	0.00100079	0.000692349	0.000618959	0.00076102	0.000777791	0.000625541	0.000499764	0.00137036	0.000877001	0.000759201	0.00118261	0.00042151
Geary's I	1.11452	SSD			Tianjin	0.0115931	0	0.00379057	0.00244346	0.00197543	0.00218166	0.00153751	0.00124569	0.00119777	0.00155254	0.00109384	0.00163232	0.000722917	0.0010999	0.0044118	0.00191125	0.00116185	0.000918594	0.000651991	0.000586503	0.000712219	0.000726887	0.000592409	0.000478388	0.00122079	0.000815323	0.000710626	0.00107314	0.000406098
					Shijiazhuang	0.00573375	0.00379057	0	0.00687554	0.00182348	0.00141052	0.00110989	0.000949342	0.00125355	0.00164756	0.00114016	0.00173769	0.000829373	0.00122834	0.00527657	0.00385497	0.00167537	0.0012124	0.000787431	0.000693862	0.000877486	0.000899858	0.000702144	0.000547483	0.00172075	0.000993276	0.000875068	0.00102666	0.000454955
					Taiyuan	0.00312647	0.00244346	0.00687554	0	0.00248164	0.00126554	0.00101811	0.000881381	0.00106025	0.00132908	0.000977986	0.00138712	0.000630008	0.00102866	0.00298543	0.0027526	0.00134712	0.00103334	0.000708091	0.000631511	0.000795317	0.0010638	0.00064563	0.000612514	0.00243971	0.00119687	0.00102933	0.00120688	0.000493398
					Hohehot	0.00238118	0.00197543	0.00182348	0.00248164	0	0.00112802	0.000927174	0.000812404	0.000745657	0.000869321	0.000704011	0.000893781	0.00048085	0.00059396	0.00136448	0.00116612	0.000836801	0.000704011	0.000536208	0.00049111	0.000602294	0.000744608	0.000512338	0.000491262	0.00123025	0.00138833	0.00116783	0.00234948	0.000523139
					Shenyang	0.00214339	0.00218166	0.00141052	0.00126554	0.00112802	0	0.00520737	0.00290356	0.000773247	0.000907053	0.000728555	0.000933715	0.000542991	0.000738377	0.00145979	0.00103267	0.0008054	0.000680484	0.000522279	0.000479399	0.000560427	0.000569469	0.000483338	0.000404649	0.000833289	0.000622355	0.00055944	0.000762116	0.000351772
					Changchun	0.0015184	0.00153751	0.00110989	0.00101811	0.000927174	0.00520737	0	0.00656301	0.000673272	0.000772495	0.000639134	0.000791749	0.000491718	0.000646681	0.00114016	0.000861774	0.000697518	0.000601837	0.000474671	0.000438985	0.000505973	0.000513332	0.000442286	0.000375473	0.00071834	0.000555915	0.000505168	0.000664818	0.000329512
					Harbin	0.00123311	0.00124569	0.000949342	0.000881381	0.000812404	0.00290356	0.00656301	0	0.00061063	0.000691144	0.000582416	0.000706516	0.000457445	0.000588676	0.000971406	0.00076175	0.000630508	0.000551284	0.000442656	0.000411463	0.000469757	0.000476094	0.000414362	0.000355154	0.000647472	0.000512504	0.000469063	0.000603667	0.000313759
					Shanghai	0.00108561	0.00119777	0.00125355	0.00106025	0.000745657	0.000773247	0.000673272	0.00061063	0	0.00524175	0.00790174	0.00258252	0.00134597	0.00188181	0.00164415	0.00159143	0.00128603	0.00131586	0.000877486	0.000762848	0.00063126	0.000675563	0.000773623	0.000588458	0.00105252	0.000726887	0.000661495	0.000674416	0.000389563
					Nanjing	0.00136918	0.00155254	0.00164756	0.00132908	0.000869321	0.000907053	0.000772495	0.000691144	0.00524175	0	0.00370221	0.00509054	0.00135285	0.00189529	0.00239555	0.00228525	0.00129021	0.00132244	0.000880404	0.000765053	0.000758839	0.000775512	0.000773247	0.000589769	0.00131696	0.000843916	0.00075703	0.000774	0.00042084
					Hangzhou	0.000999527	0.00109384	0.00114016	0.000977986	0.000704011	0.000728555	0.000639134	0.000582416	0.00790174	0.00370221	0	0.00352162	0.00162232	0.00247006	0.00145444	0.00141303	0.00132134	0.00157878	0.000987103	0.000844364	0.000686069	0.000622355	0.000857586	0.000635808	0.000971406	0.000687256	0.000628512	0.000640165	0.000390713
					Hefei	0.00147882	0.00163232	0.00173769	0.00138712	0.000893781	0.000933715	0.000791749	0.000706516	0.00258252	0.00509054	0.00352162	0	0.00132797	0.0033227	0.00259094	0.0024624	0.00134483	0.00129547	0.00086837	0.000718665	0.00077741	0.000794919	0.000765053	0.000512669	0.00137392	0.000866948	0.000775512	0.000793331	0.00042649
					Fuzhou	0.000680484	0.000722917	0.000829373	0.000630008	0.00048085	0.000542991	0.000491718	0.000457445	0.00134597	0.00135285	0.00162232	0.00132797	0	0.00255345	0.000864588	0.000963159	0.00156787	0.00161244	0.00100016	0.000853897	0.000690243	0.000566221	0.000864118	0.000641199	0.000664818	0.000518189	0.000484075	0.000490958	0.000320405
					Nanchang	0.0010961	0.0010999	0.00122834	0.00102866	0.00059396	0.000738377	0.000646681	0.000588676	0.00188181	0.00189529	0.00247006	0.0033227	0.00255345	0	0.00139688	0.00171332	0.00406202	0.00379057	0.00155406	0.00122739	0.000915417	0.000709356	0.00124862	0.000831109	0.00112482	0.000760656	0.000689344	0.000703388	0.000361706
					Jinan	0.00319567	0.0044118	0.00527657	0.00298543	0.00136448	0.00145979	0.00114016	0.000971406	0.00164415	0.00239555	0.00145444	0.00259094	0.000864588	0.00139688	0	0.00238476	0.00132134	0.0010155	0.000736665	0.000654139	0.0007695	0.000786651	0.00063126	0.000509217	0.0013494	0.000857123	0.000767641	0.000863179	0.000424099
					Zhengzhou	0.00230515	0.00191125	0.00385497	0.0027526	0.00116612	0.00103267	0.000861774	0.00076175	0.00159143	0.00228525	0.00141303	0.0024624	0.000963159	0.00171332	0.00238476	0	0.00296315	0.00176865	0.000989563	0.000846164	0.00113609	0.00117387	0.000858513	0.000638107	0.00310812	0.00133804	0.00113204	0.00117041	0.000515833
					Wuchang	0.00129653	0.00116185	0.00167537	0.00134712	0.000836801	0.0008054	0.000697518	0.000630508	0.00128603	0.00129021	0.00132134	0.00134483	0.00156787	0.00406202	0.00132134	0.00296315	0	0.00438743	0.00148573	0.00118438	0.00128812	0.000914363	0.00120871	0.000813236	0.00151695	0.000921793	0.000819107	0.000839012	0.00043935
					Changsha	0.00100079	0.000918594	0.0012124	0.00103334	0.000704011	0.000680484	0.000601837	0.000551284	0.00131586	0.00132244	0.00157878	0.00129547	0.00161244	0.00379057	0.0010155	0.00176865	0.00438743	0	0.00224646	0.00162232	0.00111927	0.000825923	0.00166135	0.000995767	0.00113043	0.000763214	0.000691445	0.000705575	0.000399761
					Guangzhou	0.000692349	0.000651991	0.000787431	0.000708091	0.000536208	0.000522279	0.000474671	0.000442656	0.000877486	0.000880404	0.000987103	0.00086837	0.00100016	0.00155406	0.000736665	0.000989563	0.00148573	0.00224646	0	0.00120871	0.000785096	0.000628512	0.00101811	0.00072226	0.000752368	0.000569878	0.000528887	0.000537115	0.000339442
					Nanning	0.000618959	0.000586503	0.000693862	0.000631511	0.00049111	0.000479399	0.000438985	0.000411463	0.000762848	0.000765053	0.000844364	0.000718665	0.000853897	0.00122739	0.000654139	0.000846164	0.00118438	0.00162232	0.00120871	0	0.00119597	0.000866948	0.00183613	0.00105602	0.000666491	0.000519205	0.000484962	0.00049187	0.000320794
					Chongqing	0.00076102	0.000712219	0.000877486	0.000795317	0.000602294	0.000560427	0.000505973	0.000469757	0.00063126	0.000758839	0.000686069	0.00077741	0.000690243	0.000915417	0.0007695	0.00113609	0.00128812	0.00111927	0.000785096	0.00119597	0	0.00315129	0.00343034	0.00144124	0.00117998	0.000947643	0.000839455	0.000860373	0.000449929
					Chengdu	0.000777791	0.000726887	0.000899858	0.0010638	0.000744608	0.000569469	0.000513332	0.000476094	0.000675563	0.000775512	0.000622355	0.000794919	0.000566221	0.000709356	0.000786651	0.00117387	0.000914363	0.000825923	0.000628512	0.000866948	0.00315129	0	0.00164245	0.00144386	0.00188628	0.00135516	0.00114427	0.00118349	0.000524867
					Guiyang	0.000625541	0.000592409	0.000702144	0.00064563	0.000512338	0.000483338	0.000442286	0.000414362	0.000773623	0.000773247	0.000857586	0.000765053	0.000864118	0.00124862	0.00063126	0.000858513	0.00120871	0.00166135	0.00101811	0.00183613	0.00343034	0.00164245	0	0.00248552	0.000877971	0.000742519	0.000674416	0.000687851	0.000397758
					Kunming	0.000499764	0.000478388	0.000547483	0.000612514	0.000491262	0.000404649	0.000375473	0.000355154	0.000588458	0.000589769	0.000635808	0.000512669	0.000641199	0.000831109	0.000509217	0.000638107	0.000813236	0.000995767	0.00072226	0.00105602	0.00144124	0.00144386	0.00248552	0	0.000817842	0.000699053	0.000638364	0.000650389	0.000384937
					Xi'an	0.00137036	0.00122079	0.00172075	0.00243971	0.00123025	0.000833289	0.00071834	0.000647472	0.00105252	0.00131696	0.000971406	0.00137392	0.000664818	0.00112482	0.0013494	0.00310812	0.00151695	0.00113043	0.000752368	0.000666491	0.00117998	0.00188628	0.000877971	0.000817842	0	0.00234948	0.00178055	0.00187736	0.000618477
					Lanzhou	0.000877001	0.000815323	0.000993276	0.00119687	0.00138833	0.000622355	0.000555915	0.000512504	0.000726887	0.000843916	0.000687256	0.000866948	0.000518189	0.000760656	0.000857123	0.00133804	0.000921793	0.000763214	0.000569878	0.000519205	0.000947643	0.00135516	0.000742519	0.000699053	0.00234948	0	0.007353	0.00339369	0.000839455
					Xining	0.000759201	0.000710626	0.000875068	0.00102933	0.00116783	0.00055944	0.000505168	0.000469063	0.000661495	0.00075703	0.000628512	0.000775512	0.000484075	0.000689344	0.000767641	0.00113204	0.000819107	0.000691445	0.000528887	0.000484962	0.000839455	0.00114427	0.000674416	0.000638364	0.00178055	0.007353	0	0.002322	0.000753439
					Yinchuan	0.00118261	0.00107314	0.00102666	0.00120688	0.00234948	0.000762116	0.000664818	0.000603667	0.000674416	0.000774	0.000640165	0.000793331	0.000490958	0.000703388	0.000863179	0.00117041	0.000839012	0.000705575	0.000537115	0.00049187	0.000860373	0.00118349	0.000687851	0.000650389	0.00187736	0.00339369	0.002322	0	0.000790961
					Urumchi	0.00042151	0.000406098	0.000454955	0.000493398	0.000523139	0.000351772	0.000329512	0.000313759	0.000389563	0.00042084	0.000390713	0.00042649	0.000320405	0.000361706	0.000424099	0.000515833	0.00043935	0.000399761	0.000339442	0.000320794	0.000449929	0.000524867	0.000397758	0.000384937	0.000618477	0.000839455	0.000753439	0.000790961	0
																																		1
				z	W*Z	Beijing	Tianjin	Shijiazhuang	Taiyuan	Hohehot	Shenyang	Changchun	Harbin	Shanghai	Nanjing	Hangzhou	Hefei	Fuzhou	Nanchang	Jinan	Zhengzhou	Wuchang	Changsha	Guangzhou	Nanning	Chongqing	Chengdu	Guiyang	Kunming	Xi'an	Lanzhou	Xining	Yinchuan	Urumchi
				2.24779	Beijing	0	0.0276703	0.0447742	0.0206496	0.0234996	0.00775987	0.00957815	0.00613979	0.00153926	0.00683509	0.00676778	0.0130199	0.00524312	0.00915979	0.0208185	0.0154335	0.00152585	0.00742284	0.000652235	0.00559732	0.00151506	0.00341716	0.00501608	0.00335775	0.0064002	0.00705861	0.00773484	0.0128308	0.0034704
				0.702862	Tianjin	0.0276703	0	0.00591812	0.00256738	0.00503531	0.0002793	0.00143668	0.000587004	0.00896403	0.000737821	0.00122251	0.00330193	0.00109523	0.00199231	0.00447773	0.0020775	0.000245945	0.00127578	0.000215063	0.00125404	1.27809e-05	0.00022078	0.000980971	0.000524527	0.000463527	0.00136114	0.00192755	0.00328249	0.000712349
				-0.546648	Shijiazhuang	0.0447742	0.00591812	0	0.000346426	0.000219611	0.00112157	8.87997e-05	0.000300963	0.0199085	0.000516928	4.21748e-05	5.18616e-05	2.88566e-07	1.14054e-05	0.000309185	0.00016506	0.00489666	6.11537e-06	0.00261931	3.14026e-05	0.0016795	0.000438904	9.77311e-07	2.24273e-05	0.000690174	1.7994e-06	0.00013823	0.000256074	2.55409e-06
				-0.322181	Taiyuan	0.0206496	0.00256738	0.000346426	0	0.000810546	0.000563432	3.47111e-06	0.000101039	0.014995	0.000149754	1.01015e-06	0.000218869	2.66867e-05	0.000105879	9.24648e-07	8.47105e-07	0.00297123	2.43306e-05	0.00181129	0.000120712	0.00106834	0.000238932	4.42424e-05	2.98348e-07	0.000407817	8.53426e-05	0.00039812	0.000632422	4.42263e-05
				-0.893686	Hohehot	0.0234996	0.00503531	0.000219611	0.000810546	0	0.00173093	0.000367872	0.000672878	0.0139946	0.000715421	0.000204808	2.71473e-05	6.43039e-05	3.7324e-05	0.000473531	0.00035785	0.00353947	0.000123042	0.00252699	8.85773e-06	0.00180366	0.000813796	4.91498e-05	0.000148301	0.00118238	0.000128705	2.96765e-06	5.45579e-05	3.87356e-05
				0.34506	Shenyang	0.00775987	0.0002793	0.00112157	0.000563432	0.00173093	0	0.00193038	0.000313636	0.00739965	9.97209e-05	0.00035636	0.00105798	0.000413882	0.000720862	0.000616083	0.00048425	0.000538771	0.000458325	0.000453792	0.000584773	0.000135527	2.12823e-05	0.000417155	0.000192269	5.56356e-05	0.00054323	0.000929745	0.00147488	0.000328689
				-0.263791	Changchun	0.00957815	0.00143668	8.87997e-05	3.47111e-06	0.000367872	0.00193038	0	0.000515244	0.00922869	5.93929e-05	5.23795e-06	0.000164354	3.43236e-05	9.2996e-05	1.89712e-06	4.96878e-06	0.00141987	2.7007e-05	0.00112717	0.000107821	0.00061291	8.86359e-05	4.53367e-05	2.43073e-06	8.82282e-05	5.88701e-05	0.000233799	0.000406842	4.21803e-05
				0.0163999	Harbin	0.00613979	0.000587004	0.000300963	0.000101039	0.000672878	0.000313636	0.000515244	0	0.00715109	5.85565e-09	8.00433e-05	0.000382515	0.000135571	0.000255967	0.000100084	9.66084e-05	0.000828855	0.000133461	0.000703644	0.000247637	0.00031619	8.7208e-06	0.000149347	4.61947e-05	3.19703e-06	0.000187968	0.000432735	0.000681446	0.000127703
				3.43853	Shanghai	0.00153926	0.00896403	0.0199085	0.014995	0.0139946	0.00739965	0.00922869	0.00715109	0	0.0614906	0.113672	0.0446478	0.0211767	0.0313491	0.0230361	0.0227181	0.00665942	0.0201599	0.00409909	0.0134433	0.00427294	0.00729812	0.0125176	0.00842053	0.011825	0.0117921	0.0127056	0.0135636	0.00642175
				0.0134892	Nanjing	0.00683509	0.000737821	0.000516928	0.000149754	0.000715421	9.97209e-05	5.93929e-05	5.85565e-09	0.0614906	0	0.000500848	0.00273431	0.000396663	0.000816846	0.000242357	0.000285107	0.00170471	0.000316373	0.00140596	0.000456994	0.000514399	1.4823e-05	0.000276003	7.54777e-05	7.05262e-06	0.00030655	0.000694173	0.000868945	0.000169727
				-0.35432	Hangzhou	0.00676778	0.00122251	4.21748e-05	1.01015e-06	0.000204808	0.00035636	5.23795e-06	8.00433e-05	0.113672	0.000500848	0	0.000469387	4.89341e-05	0.000205857	3.59801e-06	3.01029e-07	0.00304188	2.32323e-05	0.0026275	0.000138543	0.000973407	0.000159384	4.52229e-05	6.44545e-08	0.00018891	3.79185e-05	0.000218619	0.000306331	2.79066e-05
				-0.719405	Hefei	0.0130199	0.00330193	5.18616e-05	0.000218869	2.71473e-05	0.00105798	0.000164354	0.000382515	0.0446478	0.00273431	0.000469387	0	4.8654e-05	1.93932e-05	0.000445845	0.000354975	0.00476511	7.69873e-05	0.00346167	1.14879e-06	0.00188276	0.000603262	1.4036e-05	7.21533e-05	0.000892711	1.46953e-05	3.91522e-05	8.46566e-05	4.08192e-06
				-0.527995	Fuzhou	0.00524312	0.00109523	2.88566e-07	2.66867e-05	6.43039e-05	0.000413882	3.43236e-05	0.000135571	0.0211767	0.000396663	4.89341e-05	4.8654e-05	0	3.37769e-05	4.31544e-05	3.41401e-05	0.00448301	4.42199e-06	0.00325921	4.57195e-05	0.00128573	0.000261618	2.70611e-06	2.1648e-05	0.000251176	1.94184e-06	8.38125e-05	0.000131774	2.8058e-06
				-0.643008	Nanchang	0.00915979	0.00199231	1.14054e-05	0.000105879	3.7324e-05	0.000720862	9.2996e-05	0.000255967	0.0313491	0.000816846	0.000205857	1.93932e-05	3.37769e-05	0	0.000159987	0.000157593	0.0132482	0.000106198	0.00573008	1.66239e-05	0.00200467	0.000448048	4.35408e-06	7.4181e-05	0.000598887	2.20144e-06	6.24917e-05	0.000114272	1.66169e-07
				-0.304582	Jinan	0.0208185	0.00447773	0.000309185	9.24648e-07	0.000473531	0.000616083	1.89712e-06	0.000100084	0.0230361	0.000242357	3.59801e-06	0.000445845	4.31544e-05	0.000159987	0	2.94501e-06	0.00284571	2.97098e-05	0.00184314	0.000135307	0.00100251	0.000163806	4.92696e-05	8.01317e-07	0.000206563	6.94383e-05	0.000313947	0.00047458	4.2615e-05
				-0.339724	Zhengzhou	0.0154335	0.0020775	0.00016506	8.47105e-07	0.00035785	0.00048425	4.96878e-06	9.66084e-05	0.0227181	0.000285107	3.01029e-07	0.000354975	3.41401e-05	0.000157593	2.94501e-06	0	0.00669091	3.26662e-05	0.00258713	0.000149024	0.00157264	0.000283535	5.12097e-05	1.30791e-08	0.00056509	8.32842e-05	0.000413494	0.000583948	4.09775e-05
				1.16295	Wuchang	0.00152585	0.000245945	0.00489666	0.00297123	0.00353947	0.000538771	0.00141987	0.000828855	0.00665942	0.00170471	0.00304188	0.00476511	0.00448301	0.0132482	0.00284571	0.00669091	0	0.01178	1.93898e-05	0.00437673	0.000137006	0.00093498	0.00368862	0.0018474	0.00175722	0.00282997	0.00363655	0.0040942	0.00139913
				-0.475627	Changsha	0.00742284	0.00127578	6.11537e-06	2.43306e-05	0.000123042	0.000458325	2.7007e-05	0.000133461	0.0201599	0.000316373	2.32323e-05	7.69873e-05	4.42199e-06	0.000106198	2.97098e-05	3.26662e-05	0.01178	0	0.00690197	0.000130629	0.00192797	0.000325076	1.94963e-05	1.71865e-05	0.000357414	9.84644e-06	0.000151746	0.000229598	8.51514e-06
				1.27719	Guangzhou	0.000652235	0.000215063	0.00261931	0.00181129	0.00252699	0.000453792	0.00112717	0.000703644	0.00409909	0.00140596	0.0026275	0.00346167	0.00325921	0.00573008	0.00184314	0.00258713	1.93898e-05	0.00690197	0	0.00501332	0.000152251	0.000796097	0.0035266	0.00189888	0.00106637	0.00198515	0.00260959	0.00289911	0.00122379
				-0.759387	Nanning	0.00559732	0.00125404	3.14026e-05	0.000120712	8.85773e-06	0.000584773	0.000107821	0.000247637	0.0134433	0.000456994	0.000138543	1.14879e-06	4.57195e-05	1.66239e-05	0.000135307	0.000149024	0.00437673	0.000130629	0.00501332	0	0.00304719	0.000719701	5.65084e-05	0.000181991	0.000477081	1.50361e-05	1.65456e-05	4.04257e-05	6.09262e-06
				0.836822	Chongqing	0.00151506	1.27809e-05	0.0016795	0.00106834	0.00180366	0.000135527	0.00061291	0.00031619	0.00427294	0.000514399	0.000973407	0.00188276	0.00128573	0.00200467	0.00100251	0.00157264	0.000137006	0.00192797	0.000152251	0.00304719	0	0.00147901	0.00692452	0.00201044	0.000664008	0.0019271	0.00266247	0.00305027	0.000956962
				0.151742	Chengdu	0.00341716	0.00022078	0.000438904	0.000238932	0.000813796	2.12823e-05	8.86359e-05	8.7208e-06	0.00729812	1.4823e-05	0.000159384	0.000603262	0.000261618	0.000448048	0.000163806	0.000283535	0.00093498	0.000325076	0.000796097	0.000719701	0.00147901	0	0.000888978	0.000355203	7.98744e-06	0.000743998	0.00137411	0.00169802	0.00031388
				-0.583956	Guiyang	0.00501608	0.000980971	9.77311e-07	4.42424e-05	4.91498e-05	0.000417155	4.53367e-05	0.000149347	0.0125176	0.000276003	4.52229e-05	1.4036e-05	2.70611e-06	4.35408e-06	4.92696e-05	5.12097e-05	0.00368862	1.94963e-05	0.0035266	5.65084e-05	0.00692452	0.000888978	0	0.000142814	0.000394856	2.05012e-08	8.7472e-05	0.000146891	5.62873e-07
				-0.344251	Kunming	0.00335775	0.000524527	2.24273e-05	2.98348e-07	0.000148301	0.000192269	2.43073e-06	4.61947e-05	0.00842053	7.54777e-05	6.44545e-08	7.21533e-05	2.1648e-05	7.4181e-05	8.01317e-07	1.30791e-08	0.0018474	1.71865e-05	0.00189888	0.000181991	0.00201044	0.000355203	0.000142814	0	0.000151867	4.19467e-05	0.000229692	0.000320349	2.96047e-05
				0.0866687	Xi'an	0.0064002	0.000463527	0.000690174	0.000407817	0.00118238	5.56356e-05	8.82282e-05	3.19703e-06	0.011825	7.05262e-06	0.00018891	0.000892711	0.000251176	0.000598887	0.000206563	0.00056509	0.00175722	0.000357414	0.00106637	0.000477081	0.000664008	7.98744e-06	0.000394856	0.000151867	0	0.00107327	0.00189179	0.00240884	0.000310233
				-0.589211	Lanzhou	0.00705861	0.00136114	1.7994e-06	8.53426e-05	0.000128705	0.00054323	5.88701e-05	0.000187968	0.0117921	0.00030655	3.79185e-05	1.46953e-05	1.94184e-06	2.20144e-06	6.94383e-05	8.32842e-05	0.00282997	9.84644e-06	0.00198515	1.50361e-05	0.0019271	0.000743998	2.05012e-08	4.19467e-05	0.00107327	0	0.000926061	0.000708336	8.7924e-07
				-0.944096	Xining	0.00773484	0.00192755	0.00013823	0.00039812	2.96765e-06	0.000929745	0.000233799	0.000432735	0.0127056	0.000694173	0.000218619	3.91522e-05	8.38125e-05	6.24917e-05	0.000313947	0.000413494	0.00363655	0.000151746	0.00260959	1.65456e-05	0.00266247	0.00137411	8.7472e-05	0.000229692	0.00189179	0.000926061	0	2.41464e-05	7.83727e-05
				-1.04607	Yinchuan	0.0128308	0.00328249	0.000256074	0.000632422	5.45579e-05	0.00147488	0.000406842	0.000681446	0.0135636	0.000868945	0.000306331	8.46566e-05	0.000131774	0.000114272	0.00047458	0.000583948	0.0040942	0.000229598	0.00289911	4.04257e-05	0.00305027	0.00169802	0.000146891	0.000320349	0.00240884	0.000708336	2.41464e-05	0	0.000142529
				-0.621574	Urumchi	0.0034704	0.000712349	2.55409e-06	4.42263e-05	3.87356e-05	0.000328689	4.21803e-05	0.000127703	0.00642175	0.000169727	2.79066e-05	4.08192e-06	2.8058e-06	1.66169e-07	4.2615e-05	4.09775e-05	0.00139913	8.51514e-06	0.00122379	6.09262e-06	0.000956962	0.00031388	5.62873e-07	2.96047e-05	0.000310233	8.7924e-07	7.83727e-05	0.000142529	0
																																		2.22905

## Sheet: Geary-Exp
					z'	2.24779	0.702862	-0.546648	-0.322181	-0.893686	0.34506	-0.263791	0.0163999	3.43853	0.0134892	-0.35432	-0.719405	-0.527995	-0.643008	-0.304582	-0.339724	1.16295	-0.475627	1.27719	-0.759387	0.836822	0.151742	-0.583956	-0.344251	0.0866687	-0.589211	-0.944096	-1.04607	-0.621574
City	Population size in 2000	z		z	Z	Beijing	Tianjin	Shijiazhuang	Taiyuan	Hohehot	Shenyang	Changchun	Harbin	Shanghai	Nanjing	Hangzhou	Hefei	Fuzhou	Nanchang	Jinan	Zhengzhou	Wuchang	Changsha	Guangzhou	Nanning	Chongqing	Chengdu	Guiyang	Kunming	Xi'an	Lanzhou	Xining	Yinchuan	Urumchi
Beijing	9496688	2.24779		2.24779	Beijing	0	2.3868	7.80888	6.60475	9.86887	3.62038	6.30804	4.9791	1.41787	4.9921	6.77098	8.80425	7.70498	8.35671	6.51461	6.69523	1.17687	7.417	0.94206	9.04311	1.99083	4.39342	8.01879	6.71868	4.67045	8.04857	10.1881	10.8495	8.23325
Tianjin	5313702	0.702862		0.702862	Tianjin	2.3868	0	1.56127	1.05071	2.54896	0.128022	0.934419	0.47123	7.48391	0.475235	1.11763	2.02284	1.51501	1.81137	1.01494	1.08699	0.211684	1.38884	0.329855	2.13817	0.0179452	0.303733	1.6559	1.09645	0.379694	1.66945	2.71247	3.05877	1.75413
Shijiazhuang	1930579	-0.546648		-0.546648	Shijiazhuang	7.80888	1.56127	0	0.0503853	0.120435	0.795144	0.0800078	0.317023	15.8817	0.313754	0.0369901	0.0298451	0.000347933	0.00928521	0.0585957	0.0428175	2.92274	0.005044	3.32639	0.0452578	1.91399	0.487748	0.0013919	0.0409644	0.40109	0.00181158	0.157965	0.249423	0.00561393
Taiyuan	2538336	-0.322181		-0.322181	Taiyuan	6.60475	1.05071	0.0503853	0	0.326617	0.445211	0.00340937	0.114637	14.143	0.112675	0.00103289	0.157787	0.0423593	0.10293	0.00030972	0.000307747	2.20562	0.0235455	2.558	0.191149	1.34329	0.224603	0.068526	0.000487087	0.167158	0.0713047	0.386777	0.524016	0.089636
Hohehot	990954	-0.893686		-0.893686	Hohehot	9.86887	2.54896	0.120435	0.326617	0	1.53449	0.396767	0.828256	18.7681	0.822966	0.290915	0.0303736	0.13373	0.0628393	0.347042	0.306873	4.22976	0.174773	4.71271	0.0180362	2.99465	1.09292	0.0959323	0.301878	0.961094	0.0927049	0.00254116	0.0232212	0.0740446
Shenyang	4344933	0.34506		0.34506	Shenyang	3.62038	0.128022	0.795144	0.445211	1.53449	0	0.370701	0.108018	9.56958	0.109939	0.489133	1.13309	0.762226	0.976279	0.422036	0.46893	0.668948	0.673528	0.86887	1.2198	0.241829	0.0373721	0.863072	0.475151	0.0667663	0.872862	1.66192	1.93525	0.934382
Changchun	2696430	-0.263791		-0.263791	Changchun	6.30804	0.934419	0.0800078	0.00340937	0.396767	0.370701	0	0.0785072	13.7072	0.0768846	0.00819539	0.207584	0.0698035	0.143805	0.0016639	0.00576576	2.0356	0.0448742	2.37463	0.245615	1.21135	0.172668	0.102505	0.00647379	0.122822	0.105898	0.462814	0.611961	0.128008
Harbin	3455065	0.0163999		0.0163999	Harbin	4.9791	0.47123	0.317023	0.114637	0.828256	0.108018	0.0785072	0	11.711	8.4724e-06	0.137433	0.541409	0.296366	0.434819	0.10303	0.126824	1.31458	0.24209	1.5896	0.601845	0.673092	0.0183174	0.360427	0.130069	0.0049377	0.366764	0.922551	1.12884	0.407011
Shanghai	12720701	3.43853		3.43853	Shanghai	1.41787	7.48391	15.8817	14.143	18.7681	9.56958	13.7072	11.711	0	11.7309	14.3857	17.2885	15.7334	16.659	14.0109	14.2752	5.17827	15.3207	4.6714	17.6225	6.76891	10.803	16.1804	14.3095	11.235	16.2227	19.2074	20.1117	16.4845
Nanjing	3447184	0.0134892		0.0134892	Nanjing	4.9921	0.475235	0.313754	0.112675	0.822966	0.109939	0.0768846	8.4724e-06	11.7309	0	0.135283	0.537134	0.293205	0.430988	0.10117	0.12476	1.32127	0.239234	1.59695	0.597337	0.677876	0.0191138	0.356941	0.127978	0.00535524	0.363247	0.916968	1.12267	0.403305
Hangzhou	2451319	-0.35432		-0.35432	Hangzhou	6.77098	1.11763	0.0369901	0.00103289	0.290915	0.489133	0.00819539	0.137433	14.3857	0.135283	0	0.133287	0.0301631	0.0833407	0.00247381	0.000213037	2.30212	0.0147154	2.66183	0.164079	1.41882	0.256098	0.0527328	0.000101374	0.194471	0.0551737	0.347835	0.478519	0.0714248
Hefei	1462828	-0.719405		-0.719405	Hefei	8.80425	2.02284	0.0298451	0.157787	0.0303736	1.13309	0.207584	0.541409	17.2885	0.537134	0.133287	0	0.0366379	0.00583659	0.172078	0.144158	3.54327	0.059428	3.9864	0.00159851	2.42184	0.758897	0.0183465	0.140741	0.649755	0.0169507	0.0504856	0.10671	0.00957095
Fuzhou	1981083	-0.527995		-0.527995	Fuzhou	7.70498	1.51501	0.000347933	0.0423593	0.13373	0.762226	0.0698035	0.296366	15.7334	0.293205	0.0301631	0.0366379	0	0.0132279	0.0499132	0.035446	2.8593	0.00274243	3.2587	0.0535421	1.86272	0.462042	0.00313164	0.0337617	0.377812	0.00374735	0.17314	0.268402	0.00875705
Nanchang	1669679	-0.643008		-0.643008	Nanchang	8.35671	1.81137	0.00928521	0.10293	0.0628393	0.976279	0.143805	0.434819	16.659	0.430988	0.0833407	0.00583659	0.0132279	0	0.114532	0.091981	3.26149	0.0280164	3.68717	0.0135441	2.1899	0.631627	0.0034871	0.0892554	0.532428	0.00289413	0.0906538	0.16246	0.000459403
Jinan	2585986	-0.304582		-0.304582	Jinan	6.51461	1.01494	0.0585957	0.00030972	0.347042	0.422036	0.0016639	0.10303	14.0109	0.10117	0.00247381	0.172078	0.0499132	0.114532	0	0.00123493	2.15366	0.0292562	2.50201	0.206847	1.3028	0.208232	0.0780496	0.00157362	0.153077	0.0810132	0.408977	0.549805	0.100484
Zhengzhou	2490838	-0.339724		-0.339724	Zhengzhou	6.69523	1.08699	0.0428175	0.000307747	0.306873	0.46893	0.00576576	0.126824	14.2752	0.12476	0.000213037	0.144158	0.035446	0.091981	0.00123493	0	2.25804	0.0184696	2.61442	0.176117	1.38426	0.241539	0.0596493	2.04967e-05	0.181811	0.0622436	0.365265	0.498926	0.0794395
Wuchang	6559426	1.16295		1.16295	Wuchang	1.17687	0.211684	2.92274	2.20562	4.22976	0.668948	2.0356	1.31458	5.17827	1.32127	2.30212	3.54327	2.8593	3.26149	2.15366	2.25804	0	2.68494	0.0130506	3.69539	0.106362	1.02255	3.05169	2.27166	1.15839	3.07008	4.43965	4.87979	3.18454
Changsha	2122873	-0.475627		-0.475627	Changsha	7.417	1.38884	0.005044	0.0235455	0.174773	0.673528	0.0448742	0.24209	15.3207	0.239234	0.0147154	0.059428	0.00274243	0.0280164	0.0292562	0.0184696	2.68494	0	3.07237	0.0805197	1.72252	0.393591	0.0117352	0.0172595	0.316176	0.0129013	0.219463	0.325406	0.0213006
Guangzhou	6868736	1.27719		1.27719	Guangzhou	0.94206	0.329855	3.32639	2.558	4.71271	0.86887	2.37463	1.5896	4.6714	1.59695	2.66183	3.9864	3.2587	3.68717	2.50201	2.61442	0.0130506	3.07237	0	4.14765	0.193926	1.26664	3.46387	2.62908	1.41735	3.48346	4.93412	5.39755	3.60531
Nanning	1354576	-0.759387		-0.759387	Nanning	9.04311	2.13817	0.0452578	0.191149	0.0180362	1.2198	0.245615	0.601845	17.6225	0.597337	0.164079	0.00159851	0.0535421	0.0135441	0.206847	0.176117	3.69539	0.0805197	4.14765	0	2.54788	0.830155	0.0307759	0.172337	0.71581	0.0289599	0.0341173	0.0821877	0.0189923
Chongqing	5676406	0.836822		0.836822	Chongqing	1.99083	0.0179452	1.91399	1.34329	2.99465	0.241829	1.21135	0.673092	6.76891	0.677876	1.41882	2.42184	1.86272	2.1899	1.3028	1.38426	0.106362	1.72252	0.193926	2.54788	0	0.469334	2.01861	1.39493	0.562729	2.03357	3.17167	3.54528	2.12692
Chengdu	3821511	0.151742		0.151742	Chengdu	4.39342	0.303733	0.487748	0.224603	1.09292	0.0373721	0.172668	0.0183174	10.803	0.0191138	0.256098	0.758897	0.462042	0.631627	0.208232	0.241539	1.02255	0.393591	1.26664	0.830155	0.469334	0	0.541251	0.246009	0.00423449	0.54901	1.20086	1.43475	0.598017
Guiyang	1829565	-0.583956		-0.583956	Guiyang	8.01879	1.6559	0.0013919	0.068526	0.0959323	0.863072	0.102505	0.360427	16.1804	0.356941	0.0527328	0.0183465	0.00313164	0.0034871	0.0780496	0.0596493	3.05169	0.0117352	3.46387	0.0307759	2.01861	0.541251	0	0.0574584	0.449738	2.76103e-05	0.1297	0.21355	0.00141511
Kunming	2478580	-0.344251		-0.344251	Kunming	6.71868	1.09645	0.0409644	0.000487087	0.301878	0.475151	0.00647379	0.130069	14.3095	0.127978	0.000101374	0.140741	0.0337617	0.0892554	0.00157362	2.04967e-05	2.27166	0.0172595	2.62908	0.172337	1.39493	0.246009	0.0574584	0	0.185692	0.0600051	0.359813	0.49255	0.0769079
Xi'an	3645322	0.0866687		0.0866687	Xi'an	4.67045	0.379694	0.40109	0.167158	0.961094	0.0667663	0.122822	0.0049377	11.235	0.00535524	0.194471	0.649755	0.377812	0.532428	0.153077	0.181811	1.15839	0.316176	1.41735	0.71581	0.562729	0.00423449	0.449738	0.185692	0	0.456813	1.06247	1.2831	0.501608
Lanzhou	1815338	-0.589211		-0.589211	Lanzhou	8.04857	1.66945	0.00181158	0.0713047	0.0927049	0.872862	0.105898	0.366764	16.2227	0.363247	0.0551737	0.0169507	0.00374735	0.00289413	0.0810132	0.0622436	3.07008	0.0129013	3.48346	0.0289599	2.03357	0.54901	2.76103e-05	0.0600051	0.456813	0	0.125943	0.208721	0.00104739
Xining	854466	-0.944096		-0.944096	Xining	10.1881	2.71247	0.157965	0.386777	0.00254116	1.66192	0.462814	0.922551	19.2074	0.916968	0.347835	0.0504856	0.17314	0.0906538	0.408977	0.365265	4.43965	0.219463	4.93412	0.0341173	3.17167	1.20086	0.1297	0.359813	1.06247	0.125943	0	0.0103989	0.10402
Yinchuan	578362	-1.04607		-1.04607	Yinchuan	10.8495	3.05877	0.249423	0.524016	0.0232212	1.93525	0.611961	1.12884	20.1117	1.12267	0.478519	0.10671	0.268402	0.16246	0.549805	0.498926	4.87979	0.325406	5.39755	0.0821877	3.54528	1.43475	0.21355	0.49255	1.2831	0.208721	0.0103989	0	0.180197
Urumchi	1727712	-0.621574		-0.621574	Urumchi	8.23325	1.75413	0.00561393	0.089636	0.0740446	0.934382	0.128008	0.407011	16.4845	0.403305	0.0714248	0.00957095	0.00875705	0.000459403	0.100484	0.0794395	3.18454	0.0213006	3.60531	0.0189923	2.12692	0.598017	0.00141511	0.0769079	0.501608	0.00104739	0.10402	0.180197	0
average	3.41066e+06	1.14851e-16
stdev	2.70756e+06	0.982607			W	Beijing	Tianjin	Shijiazhuang	Taiyuan	Hohehot	Shenyang	Changchun	Harbin	Shanghai	Nanjing	Hangzhou	Hefei	Fuzhou	Nanchang	Jinan	Zhengzhou	Wuchang	Changsha	Guangzhou	Nanning	Chongqing	Chengdu	Guiyang	Kunming	Xi'an	Lanzhou	Xining	Yinchuan	Urumchi
					Beijing	0	0.00284141	0.00263345	0.00232306	0.00213095	0.00204703	0.00173466	0.00152109	0.00138323	0.00163056	0.00129178	0.00170849	0.000862057	0.00139379	0.00233698	0.00210565	0.00157402	0.00129318	0.000880982	0.000760039	0.000985762	0.00101014	0.000771262	0.000545182	0.00163144	0.00114511	0.00098309	0.00147635	0.000395763
Geary's I	1.05713	SSD			Tianjin	0.00284141	0	0.00243806	0.0021507	0.00197821	0.00206153	0.00174694	0.00153187	0.00149004	0.00175645	0.00139152	0.00180478	0.000928618	0.00139758	0.00251742	0.00194942	0.00145724	0.00119724	0.000815618	0.000703649	0.000912129	0.000934687	0.000714039	0.000504733	0.0015104	0.00106303	0.000909657	0.00137053	0.0003662
					Shijiazhuang	0.00263345	0.00243806	0	0.00270004	0.00190754	0.00166093	0.00140747	0.00123419	0.00153854	0.00181362	0.00143681	0.00186353	0.00108224	0.00151697	0.00259936	0.00244734	0.00182945	0.00150304	0.00102394	0.000883376	0.00114573	0.00117406	0.00089642	0.000633653	0.00185445	0.00128478	0.00114262	0.00132157	0.000459986
					Taiyuan	0.00232306	0.0021507	0.00270004	0	0.00216241	0.00154859	0.00131228	0.00115072	0.0013572	0.00159987	0.00126746	0.00164389	0.000778836	0.00132373	0.00229299	0.00223765	0.00161382	0.00132877	0.000905714	0.000781377	0.00103512	0.00136089	0.00080506	0.00074898	0.00214954	0.00148923	0.00132444	0.00149815	0.000533181
					Hohehot	0.00213095	0.00197821	0.00190754	0.00216241	0	0.00142516	0.00120768	0.001059	0.000963017	0.0011352	0.000899345	0.00116644	0.000509413	0.000716758	0.00162702	0.0014612	0.00109228	0.000899345	0.000613012	0.000528857	0.000731301	0.00096145	0.000568764	0.000529144	0.00151862	0.00164478	0.00146279	0.00212056	0.000588873
					Shenyang	0.00204703	0.00206153	0.00166093	0.00154859	0.00142516	0	0.00259372	0.00227439	0.00100358	0.00118302	0.000937228	0.00121557	0.00062545	0.0009521	0.00169555	0.00132804	0.00104927	0.000862057	0.000587277	0.000506655	0.000657126	0.000673377	0.000514136	0.000363428	0.00108755	0.000765838	0.000655344	0.000987369	0.000263822
					Changchun	0.00173466	0.00174694	0.00140747	0.00131228	0.00120768	0.00259372	0	0.00268396	0.000850436	0.00100249	0.000794207	0.00103008	0.000530007	0.00080681	0.00143681	0.00112539	0.00088915	0.000730507	0.000497659	0.00042934	0.000556848	0.00057062	0.000435679	0.000307969	0.000921586	0.000648971	0.000555339	0.000836697	0.000223563
					Harbin	0.00152109	0.00153187	0.00123419	0.00115072	0.001059	0.00227439	0.00268396	0	0.000745734	0.00087907	0.000696428	0.000903259	0.000464755	0.000707479	0.00125992	0.000986833	0.000779682	0.000640571	0.000436389	0.000376481	0.000488292	0.000500368	0.00038204	0.000270053	0.000808125	0.000569073	0.000486968	0.000733687	0.000196039
					Shanghai	0.00138323	0.00149004	0.00153854	0.0013572	0.000963017	0.00100358	0.000850436	0.000745734	0	0.00259654	0.00274438	0.00219196	0.00161295	0.00193571	0.00181166	0.00178046	0.0015655	0.00158948	0.00114573	0.000988442	0.000780953	0.000854137	0.00100413	0.000707095	0.00134912	0.000934687	0.000831264	0.000852284	0.000334642
					Nanjing	0.00163056	0.00175645	0.00181362	0.00159987	0.0011352	0.00118302	0.00100249	0.00087907	0.00259654	0	0.00242486	0.00258388	0.00161821	0.00194203	0.00213558	0.0020988	0.0015689	0.00159466	0.00114947	0.000991667	0.000982557	0.00100686	0.00100358	0.000709402	0.00159034	0.00110181	0.000979893	0.00100467	0.000394475
					Hangzhou	0.00129178	0.00139152	0.00143681	0.00126746	0.000899345	0.000937228	0.000794207	0.000696428	0.00274438	0.00242486	0	0.00239607	0.00179892	0.00215889	0.00169187	0.00166274	0.0015938	0.00177274	0.00127783	0.00110241	0.000870995	0.000765838	0.0011199	0.000788622	0.00125992	0.000872888	0.000776303	0.000795934	0.000336829
					Hefei	0.00170849	0.00180478	0.00186353	0.00164389	0.00116644	0.00121557	0.00103008	0.000903259	0.00219196	0.00258388	0.00239607	0	0.001599	0.00236121	0.00219434	0.00215655	0.00161207	0.00157317	0.00113397	0.000922087	0.00100959	0.00103456	0.000991667	0.000569382	0.0016341	0.00113213	0.00100686	0.00103232	0.00040533
					Fuzhou	0.000862057	0.000928618	0.00108224	0.000778836	0.000509413	0.00062545	0.000530007	0.000464755	0.00161295	0.00161821	0.00179892	0.001599	0	0.00218365	0.00112906	0.00125038	0.00176601	0.00179307	0.00129248	0.00111505	0.00087764	0.000667553	0.00112844	0.000797664	0.000836697	0.000579675	0.000515534	0.00052857	0.000207538
					Nanchang	0.00139379	0.00139758	0.00151697	0.00132373	0.000716758	0.0009521	0.00080681	0.000707479	0.00193571	0.00194203	0.00215889	0.00236121	0.00218365	0	0.00165104	0.00185042	0.00247541	0.00243806	0.00175741	0.00151615	0.00119334	0.000907683	0.00153437	0.0010846	0.00142207	0.000985227	0.000876212	0.000898369	0.000282193
					Jinan	0.00233698	0.00251742	0.00259936	0.00229299	0.00162702	0.00169555	0.00143681	0.00125992	0.00181166	0.00213558	0.00169187	0.00219434	0.00112906	0.00165104	0	0.0021321	0.0015938	0.00130943	0.000949519	0.000819168	0.000998148	0.00102283	0.000780953	0.000562928	0.00161558	0.00111929	0.000995442	0.00112722	0.000400735
					Zhengzhou	0.00210565	0.00194942	0.00244734	0.00223765	0.0014612	0.00132804	0.00112539	0.000986833	0.00178046	0.0020988	0.00166274	0.00215655	0.00125038	0.00185042	0.0021321	0	0.00228802	0.00187979	0.00128061	0.0011048	0.00143292	0.00146835	0.00112112	0.000792484	0.00231928	0.00160683	0.00142903	0.00146517	0.000575286
					Wuchang	0.00157402	0.00145724	0.00182945	0.00161382	0.00109228	0.00104927	0.00088915	0.000779682	0.0015655	0.0015689	0.0015938	0.00161207	0.00176601	0.00247541	0.0015938	0.00228802	0	0.00251469	0.00171313	0.00147795	0.0015672	0.00119205	0.00149978	0.00106015	0.00173372	0.00120114	0.00106824	0.00109525	0.000430039
					Changsha	0.00129318	0.00119724	0.00150304	0.00132877	0.000899345	0.000862057	0.000730507	0.000640571	0.00158948	0.00159466	0.00177274	0.00157317	0.00179307	0.00243806	0.00130943	0.00187979	0.00251469	0	0.00208517	0.00179892	0.00141667	0.00107755	0.00182152	0.00128758	0.00142748	0.000988978	0.000879548	0.000901789	0.00035408
					Guangzhou	0.000880982	0.000815618	0.00102394	0.000905714	0.000613012	0.000587277	0.000497659	0.000436389	0.00114573	0.00114947	0.00127783	0.00113397	0.00129248	0.00175741	0.000949519	0.00128061	0.00171313	0.00208517	0	0.00149978	0.00102061	0.000776303	0.00131228	0.00092761	0.000973002	0.000674108	0.000599518	0.000614679	0.000241348
					Nanning	0.000760039	0.000703649	0.000883376	0.000781377	0.000528857	0.000506655	0.00042934	0.000376481	0.000988442	0.000991667	0.00110241	0.000922087	0.00111505	0.00151615	0.000819168	0.0011048	0.00147795	0.00179892	0.00149978	0	0.00148842	0.00113213	0.00191377	0.00135279	0.000839427	0.000581566	0.000517216	0.000530295	0.000208215
					Chongqing	0.000985762	0.000912129	0.00114573	0.00103512	0.000731301	0.000657126	0.000556848	0.000488292	0.000780953	0.000982557	0.000870995	0.00100959	0.00087764	0.00119334	0.000998148	0.00143292	0.0015672	0.00141667	0.00102061	0.00148842	0	0.00232811	0.00238051	0.00168271	0.00147395	0.00123218	0.00109584	0.00112355	0.000450349
					Chengdu	0.00101014	0.000934687	0.00117406	0.00136089	0.00096145	0.000673377	0.00057062	0.000500368	0.000854137	0.00100686	0.000765838	0.00103456	0.000667553	0.000907683	0.00102283	0.00146835	0.00119205	0.00107755	0.000776303	0.00113213	0.00232811	0	0.00181067	0.00168454	0.00193781	0.00161997	0.00144072	0.00147715	0.000592079
					Guiyang	0.000771262	0.000714039	0.00089642	0.00080506	0.000568764	0.000514136	0.000435679	0.00038204	0.00100413	0.00100358	0.0011199	0.000991667	0.00112844	0.00153437	0.000780953	0.00112112	0.00149978	0.00182152	0.00131228	0.00191377	0.00238051	0.00181067	0	0.00216359	0.00114635	0.000958323	0.000852284	0.000873836	0.000350256
					Kunming	0.000545182	0.000504733	0.000633653	0.00074898	0.000529144	0.000363428	0.000307969	0.000270053	0.000707095	0.000709402	0.000788622	0.000569382	0.000797664	0.0010846	0.000562928	0.000792484	0.00106015	0.00128758	0.00092761	0.00135279	0.00168271	0.00168454	0.00216359	0	0.0010665	0.000891567	0.000792915	0.000812965	0.000325857
					Xi'an	0.00163144	0.0015104	0.00185445	0.00214954	0.00151862	0.00108755	0.000921586	0.000808125	0.00134912	0.00159034	0.00125992	0.0016341	0.000836697	0.00142207	0.00161558	0.00231928	0.00173372	0.00142748	0.000973002	0.000839427	0.00147395	0.00193781	0.00114635	0.0010665	0	0.00212056	0.00188592	0.00193361	0.000759214
					Lanzhou	0.00114511	0.00106303	0.00128478	0.00148923	0.00164478	0.000765838	0.000648971	0.000569073	0.000934687	0.00110181	0.000872888	0.00113213	0.000579675	0.000985227	0.00111929	0.00160683	0.00120114	0.000988978	0.000674108	0.000581566	0.00123218	0.00161997	0.000958323	0.000891567	0.00212056	0	0.00272212	0.00237406	0.00109584
					Xining	0.00098309	0.000909657	0.00114262	0.00132444	0.00146279	0.000655344	0.000555339	0.000486968	0.000831264	0.000979893	0.000776303	0.00100686	0.000515534	0.000876212	0.000995442	0.00142903	0.00106824	0.000879548	0.000599518	0.000517216	0.00109584	0.00144072	0.000852284	0.000792915	0.00188592	0.00272212	0	0.00211137	0.000974588
					Yinchuan	0.00147635	0.00137053	0.00132157	0.00149815	0.00212056	0.000987369	0.000836697	0.000733687	0.000852284	0.00100467	0.000795934	0.00103232	0.00052857	0.000898369	0.00112722	0.00146517	0.00109525	0.000901789	0.000614679	0.000530295	0.00112355	0.00147715	0.000873836	0.000812965	0.00193361	0.00237406	0.00211137	0	0.00102896
					Urumchi	0.000395763	0.0003662	0.000459986	0.000533181	0.000588873	0.000263822	0.000223563	0.000196039	0.000334642	0.000394475	0.000336829	0.00040533	0.000207538	0.000282193	0.000400735	0.000575286	0.000430039	0.00035408	0.000241348	0.000208215	0.000450349	0.000592079	0.000350256	0.000325857	0.000759214	0.00109584	0.000974588	0.00102896	0
																																		1
				z	W*Z	Beijing	Tianjin	Shijiazhuang	Taiyuan	Hohehot	Shenyang	Changchun	Harbin	Shanghai	Nanjing	Hangzhou	Hefei	Fuzhou	Nanchang	Jinan	Zhengzhou	Wuchang	Changsha	Guangzhou	Nanning	Chongqing	Chengdu	Guiyang	Kunming	Xi'an	Lanzhou	Xining	Yinchuan	Urumchi
				2.24779	Beijing	0	0.00678187	0.0205643	0.0153432	0.02103	0.00741104	0.0109423	0.00757369	0.00196125	0.0081399	0.0087466	0.015042	0.00664213	0.0116475	0.0152245	0.0140978	0.00185242	0.00959153	0.000829938	0.00687312	0.00196249	0.00443797	0.00618459	0.00366291	0.00761955	0.00921648	0.0100159	0.0160177	0.00325841
				0.702862	Tianjin	0.00678187	0	0.00380648	0.00225977	0.00504237	0.000263921	0.00163238	0.000721862	0.0111513	0.000834728	0.00155521	0.0036508	0.00140686	0.00253152	0.00255504	0.00211899	0.000308473	0.00166276	0.000269036	0.00150452	1.63683e-05	0.000283896	0.00118238	0.000553413	0.000573489	0.00177467	0.00246742	0.00419212	0.000642363
				-0.546648	Shijiazhuang	0.0205643	0.00380648	0	0.000136042	0.000229735	0.00132068	0.000112609	0.000391267	0.0244345	0.000569031	5.31478e-05	5.56172e-05	3.76548e-07	1.40854e-05	0.000152311	0.000104789	0.00534699	7.58131e-06	0.00340604	3.99796e-05	0.00219291	0.000572647	1.24772e-06	2.59572e-05	0.0007438	2.32749e-06	0.000180494	0.00032963	2.58232e-06
				-0.322181	Taiyuan	0.0153432	0.00225977	0.000136042	0	0.000706281	0.000689451	4.47404e-06	0.000131915	0.0191948	0.000180264	1.30915e-06	0.000259384	3.29909e-05	0.000136251	7.10185e-07	6.88631e-07	0.00355948	3.12865e-05	0.00231681	0.000149359	0.00139047	0.00030566	5.51676e-05	3.64819e-07	0.000359313	0.000106189	0.000512265	0.000785053	4.77923e-05
				-0.893686	Hohehot	0.02103	0.00504237	0.000229735	0.000706281	0	0.00218689	0.000479167	0.00087712	0.018074	0.000934234	0.000261633	3.5429e-05	6.81236e-05	4.50406e-05	0.000564644	0.000448403	0.00462008	0.000157181	0.00288895	9.53855e-06	0.00218999	0.00105079	5.45629e-05	0.000159737	0.00145954	0.000152479	3.71718e-06	4.9242e-05	4.36029e-05
				0.34506	Shenyang	0.00741104	0.000263921	0.00132068	0.000689451	0.00218689	0	0.000961493	0.000245675	0.00960386	0.000130061	0.000458429	0.00137735	0.000476734	0.000929515	0.000715584	0.000622759	0.000701906	0.000580619	0.000510267	0.000618019	0.000158912	2.51655e-05	0.000443736	0.000172683	7.26113e-05	0.000668471	0.00108913	0.0019108	0.00024651
				-0.263791	Changchun	0.0109423	0.00163238	0.000112609	4.47404e-06	0.000479167	0.000961493	0	0.000210711	0.0116571	7.70762e-05	6.50883e-06	0.000213828	3.69963e-05	0.000116023	2.39072e-06	6.4887e-06	0.00180995	3.27809e-05	0.00118176	0.000105452	0.000674538	9.85277e-05	4.46595e-05	1.99373e-06	0.000113191	6.87245e-05	0.000257018	0.000512026	2.86179e-05
				0.0163999	Harbin	0.00757369	0.000721862	0.000391267	0.000131915	0.00087712	0.000245675	0.000210711	0	0.0087333	7.44784e-09	9.57123e-05	0.000489033	0.000137737	0.000307625	0.000129809	0.000125154	0.00102496	0.000155076	0.000693683	0.000226583	0.000328665	9.16544e-06	0.000137698	3.51256e-05	3.99028e-06	0.000208716	0.000449253	0.000828218	7.97899e-05
				3.43853	Shanghai	0.00196125	0.0111513	0.0244345	0.0191948	0.018074	0.00960386	0.0116571	0.0087333	0	0.0304598	0.0394799	0.0378956	0.0253771	0.032247	0.025383	0.0254164	0.00810657	0.0243518	0.00535216	0.0174189	0.0052862	0.00922725	0.0162472	0.0101182	0.0151574	0.0151632	0.0159665	0.0171409	0.0055164
				0.0134892	Nanjing	0.0081399	0.000834728	0.000569031	0.000180264	0.000934234	0.000130061	7.70762e-05	7.44784e-09	0.0304598	0	0.000328044	0.00138789	0.000474467	0.00083699	0.000216056	0.000261845	0.00207294	0.000381498	0.00183564	0.000592359	0.000666052	1.92448e-05	0.000358219	9.07881e-05	8.51666e-06	0.000400229	0.000898531	0.00112791	0.000159094
				-0.35432	Hangzhou	0.0087466	0.00155521	5.31478e-05	1.30915e-06	0.000261633	0.000458429	6.50883e-06	9.57123e-05	0.0394799	0.000328044	0	0.000319366	5.42608e-05	0.000179924	4.18537e-06	3.54225e-07	0.00366911	2.60865e-05	0.00340136	0.000180882	0.00123578	0.00019613	5.90555e-05	7.99459e-08	0.000245017	4.81605e-05	0.000270026	0.00038087	2.4058e-05
				-0.719405	Hefei	0.015042	0.0036508	5.56172e-05	0.000259384	3.5429e-05	0.00137735	0.000213828	0.000489033	0.0378956	0.00138789	0.000319366	0	5.85839e-05	1.37814e-05	0.000377598	0.000310884	0.00571201	9.349e-05	0.00452047	1.47397e-06	0.00244507	0.000785126	1.81936e-05	8.01351e-05	0.00106177	1.91903e-05	5.08318e-05	0.000110159	3.87939e-06
				-0.527995	Fuzhou	0.00664213	0.00140686	3.76548e-07	3.29909e-05	6.81236e-05	0.000476734	3.69963e-05	0.000137737	0.0253771	0.000474467	5.42608e-05	5.85839e-05	0	2.88851e-05	5.63548e-05	4.43209e-05	0.00504958	4.91735e-06	0.00421181	5.9702e-05	0.0016348	0.000308438	3.53388e-06	2.69305e-05	0.000316114	2.17225e-06	8.92593e-05	0.00014187	1.81742e-06
				-0.643008	Nanchang	0.0116475	0.00253152	1.40854e-05	0.000136251	4.50406e-05	0.000929515	0.000116023	0.000307625	0.032247	0.00083699	0.000179924	1.37814e-05	2.88851e-05	0	0.000189097	0.000170204	0.00807352	6.83057e-05	0.00647986	2.05348e-05	0.00261329	0.000573317	5.35049e-06	9.68062e-05	0.000757148	2.85138e-06	7.94319e-05	0.000145949	1.29641e-07
				-0.304582	Jinan	0.0152245	0.00255504	0.000152311	7.10185e-07	0.000564644	0.000715584	2.39072e-06	0.000129809	0.025383	0.000216056	4.18537e-06	0.000377598	5.63548e-05	0.000189097	0	2.633e-06	0.0034325	3.83089e-05	0.00237571	0.000169442	0.00130039	0.000212986	6.09531e-05	8.85836e-07	0.000247308	9.06775e-05	0.000407113	0.000619751	4.02674e-05
				-0.339724	Zhengzhou	0.0140978	0.00211899	0.000104789	6.88631e-07	0.000448403	0.000622759	6.4887e-06	0.000125154	0.0254164	0.000261845	3.54225e-07	0.000310884	4.43209e-05	0.000170204	2.633e-06	0	0.00516643	3.47188e-05	0.00334804	0.000194574	0.00198353	0.000354664	6.68738e-05	1.62433e-08	0.00042167	0.000100015	0.000521975	0.00073101	4.57004e-05
				1.16295	Wuchang	0.00185242	0.000308473	0.00534699	0.00355948	0.00462008	0.000701906	0.00180995	0.00102496	0.00810657	0.00207294	0.00366911	0.00571201	0.00504958	0.00807352	0.0034325	0.00516643	0	0.00675179	2.23575e-05	0.00546161	0.00016669	0.00121893	0.00457685	0.0024083	0.00200832	0.0036876	0.00474259	0.00534458	0.00136948
				-0.475627	Changsha	0.00959153	0.00166276	7.58131e-06	3.12865e-05	0.000157181	0.000580619	3.27809e-05	0.000155076	0.0243518	0.000381498	2.60865e-05	9.349e-05	4.91735e-06	6.83057e-05	3.83089e-05	3.47188e-05	0.00675179	0	0.00640642	0.000144848	0.00244025	0.000424116	2.13759e-05	2.2223e-05	0.000451336	1.27591e-05	0.000193028	0.000293448	7.54211e-06
				1.27719	Guangzhou	0.000829938	0.000269036	0.00340604	0.00231681	0.00288895	0.000510267	0.00118176	0.000693683	0.00535216	0.00183564	0.00340136	0.00452047	0.00421181	0.00647986	0.00237571	0.00334804	2.23575e-05	0.00640642	0	0.00622055	0.000197924	0.000983296	0.00454556	0.00243876	0.00137908	0.00234823	0.00295809	0.00331776	0.000870135
				-0.759387	Nanning	0.00687312	0.00150452	3.99796e-05	0.000149359	9.53855e-06	0.000618019	0.000105452	0.000226583	0.0174189	0.000592359	0.000180882	1.47397e-06	5.9702e-05	2.05348e-05	0.000169442	0.000194574	0.00546161	0.000144848	0.00622055	0	0.00379232	0.00093984	5.88979e-05	0.000233136	0.00060087	1.68421e-05	1.7646e-05	4.35837e-05	3.9545e-06
				0.836822	Chongqing	0.00196249	1.63683e-05	0.00219291	0.00139047	0.00218999	0.000158912	0.000674538	0.000328665	0.0052862	0.000666052	0.00123578	0.00244507	0.0016348	0.00261329	0.00130039	0.00198353	0.00016669	0.00244025	0.000197924	0.00379232	0	0.00109266	0.00480533	0.00234727	0.000829432	0.00250573	0.00347565	0.00398332	0.000957855
				0.151742	Chengdu	0.00443797	0.000283896	0.000572647	0.00030566	0.00105079	2.51655e-05	9.85277e-05	9.16544e-06	0.00922725	1.92448e-05	0.00019613	0.000785126	0.000308438	0.000573317	0.000212986	0.000354664	0.00121893	0.000424116	0.000983296	0.00093984	0.00109266	0	0.000980029	0.000414413	8.20566e-06	0.000889379	0.0017301	0.00211935	0.000354073
				-0.583956	Guiyang	0.00618459	0.00118238	1.24772e-06	5.51676e-05	5.45629e-05	0.000443736	4.46595e-05	0.000137698	0.0162472	0.000358219	5.90555e-05	1.81936e-05	3.53388e-06	5.35049e-06	6.09531e-05	6.68738e-05	0.00457685	2.13759e-05	0.00454556	5.88979e-05	0.00480533	0.000980029	0	0.000124316	0.000515557	2.64595e-08	0.000110542	0.000186608	4.95652e-07
				-0.344251	Kunming	0.00366291	0.000553413	2.59572e-05	3.64819e-07	0.000159737	0.000172683	1.99373e-06	3.51256e-05	0.0101182	9.07881e-05	7.99459e-08	8.01351e-05	2.69305e-05	9.68062e-05	8.85836e-07	1.62433e-08	0.0024083	2.2223e-05	0.00243876	0.000233136	0.00234727	0.000414413	0.000124316	0	0.00019804	5.34985e-05	0.000285301	0.000400426	2.5061e-05
				0.0866687	Xi'an	0.00761955	0.000573489	0.0007438	0.000359313	0.00145954	7.26113e-05	0.000113191	3.99028e-06	0.0151574	8.51666e-06	0.000245017	0.00106177	0.000316114	0.000757148	0.000247308	0.00042167	0.00200832	0.000451336	0.00137908	0.00060087	0.000829432	8.20566e-06	0.000515557	0.00019804	0	0.000968699	0.00200374	0.00248101	0.000380828
				-0.589211	Lanzhou	0.00921648	0.00177467	2.32749e-06	0.000106189	0.000152479	0.000668471	6.87245e-05	0.000208716	0.0151632	0.000400229	4.81605e-05	1.91903e-05	2.17225e-06	2.85138e-06	9.06775e-05	0.000100015	0.0036876	1.27591e-05	0.00234823	1.68421e-05	0.00250573	0.000889379	2.64595e-08	5.34985e-05	0.000968699	0	0.000342832	0.000495516	1.14778e-06
				-0.944096	Xining	0.0100159	0.00246742	0.000180494	0.000512265	3.71718e-06	0.00108913	0.000257018	0.000449253	0.0159665	0.000898531	0.000270026	5.08318e-05	8.92593e-05	7.94319e-05	0.000407113	0.000521975	0.00474259	0.000193028	0.00295809	1.7646e-05	0.00347565	0.0017301	0.000110542	0.000285301	0.00200374	0.000342832	0	2.1956e-05	0.000101377
				-1.04607	Yinchuan	0.0160177	0.00419212	0.00032963	0.000785053	4.9242e-05	0.0019108	0.000512026	0.000828218	0.0171409	0.00112791	0.00038087	0.000110159	0.00014187	0.000145949	0.000619751	0.00073101	0.00534458	0.000293448	0.00331776	4.35837e-05	0.00398332	0.00211935	0.000186608	0.000400426	0.00248101	0.000495516	2.1956e-05	0	0.000185416
				-0.621574	Urumchi	0.00325841	0.000642363	2.58232e-06	4.77923e-05	4.36029e-05	0.00024651	2.86179e-05	7.97899e-05	0.0055164	0.000159094	2.4058e-05	3.87939e-06	1.81742e-06	1.29641e-07	4.02674e-05	4.57004e-05	0.00136948	7.54211e-06	0.000870135	3.9545e-06	0.000957855	0.000354073	4.95652e-07	2.5061e-05	0.000380828	1.14778e-06	0.000101377	0.000185416	0
																																		2.11427
